# Supplementary material for: Vitamin C epigenetically controls osteogenesis and bone mineralization
Source: PubMed Central journal article supplement (PMC9537512; doi:10.1038/s41467-022-32915-8), 2022-10-06

## **SUPPLEMENTARY INFORMATION**

### **Vitamin C epigenetically controls osteogenesis and bone mineralization**

Roman Thaler<sup>1,2,3 \*</sup>, Farzaneh Khani<sup>1</sup>, Ines Sturmlechner<sup>4</sup>, Sharareh S. Dehghani<sup>1</sup>, Janet M. Denbeigh<sup>1</sup>, Xianhu Zhou<sup>1</sup>, Oksana Pichurin<sup>1</sup>, Amel Dudakovic<sup>1,2</sup>, Sofia S. Jerez<sup>1,2</sup>, Jian Zhong<sup>5</sup>, Jeong-Heon Lee<sup>2,5</sup>, Ramesh Natarajan<sup>6</sup>, Ivo Kalajzic<sup>7</sup>, Yong-hui Jiang<sup>8</sup>, David R. Deyle<sup>9</sup>, Eleftherios P. Paschalis<sup>10</sup>, Barbara M. Misof<sup>10</sup>, Tamas Ordog<sup>5,11</sup>, Andre J. van Wijnen<sup>12 \*</sup>

<sup>1</sup> Department of Orthopedic Surgery, Mayo Clinic, Rochester, MN, USA, <sup>2</sup> Department of Biochemistry & Molecular Biology, Mayo Clinic, Rochester, MN, USA, <sup>3</sup> Center for Regenerative Medicine, Mayo Clinic, Rochester, MN, USA, <sup>4</sup> Departments of Pediatric and Adolescent Medicine, Mayo Clinic, Rochester, MN, USA, <sup>5</sup> Epigenomics Program, Center for Individualized Medicine, Mayo Clinic, Rochester, MN, USA, <sup>6</sup> Department of Internal Medicine, Virginia Commonwealth University, Richmond, VA, USA, <sup>7</sup> Department of Reconstructive Sciences, UConn Health, Farmington, CT, USA, <sup>8</sup> Department of Genetics, Neuroscience, and Pediatrics, Yale University School of Medicine, New Haven, CT, USA, <sup>9</sup> Department of Clinical Genomics, Mayo Clinic, Rochester, MN, USA, <sup>10</sup> Ludwig Boltzmann Institute of Osteology at Hanusch Hospital of OEGK and AUVA, Trauma Centre Meidling, 1st Med. Dept. Hanusch Hospital, Vienna, Austria, <sup>11</sup> Department of Physiology and Biomedical Engineering and Division of Gastroenterology and Hepatology, Department of Medicine, Mayo Clinic, Rochester, MN, USA, <sup>12</sup> Department of Biochemistry, University of Vermont, Burlington, VT, USA. \*Correspondence: Thaler.Roman@mayo.edu, andre.vanwijnen@uvm.edu

### **TABLE OF CONTENTS**

Supplementary Figures 1-17

Supplementary Tables 1-2

Uncropped blots for Supplementary Figures

**a**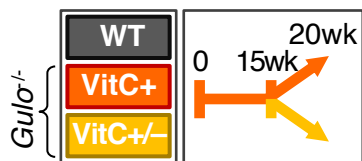**b**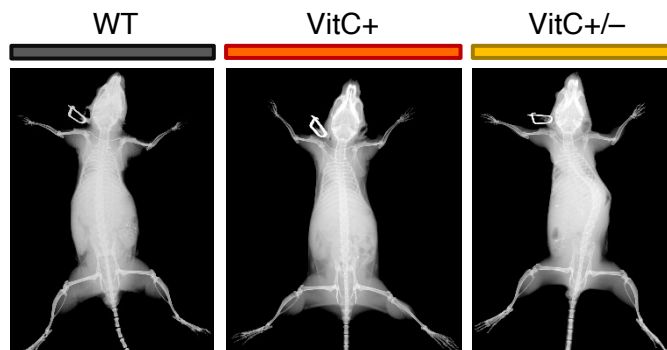**c**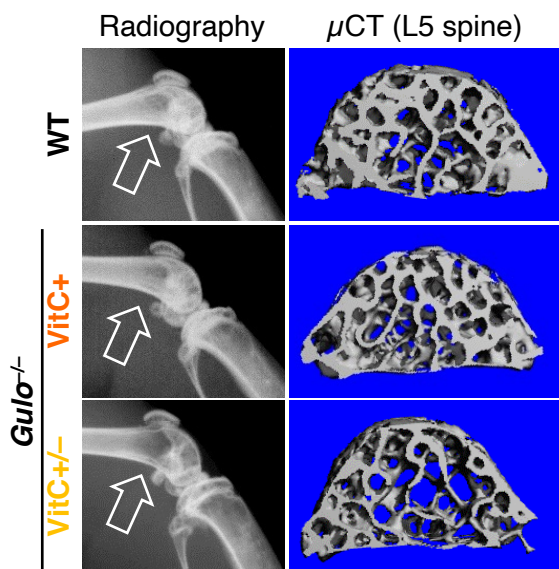**d**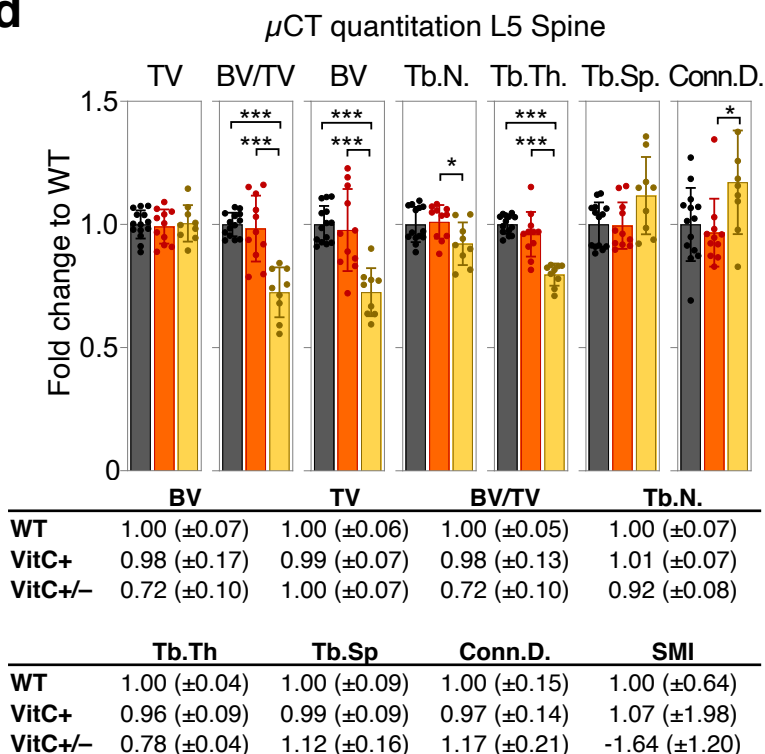**e**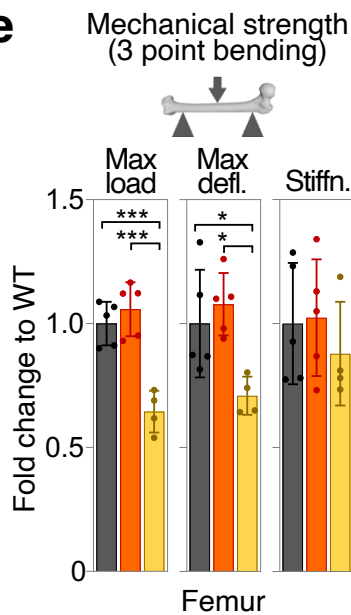**f**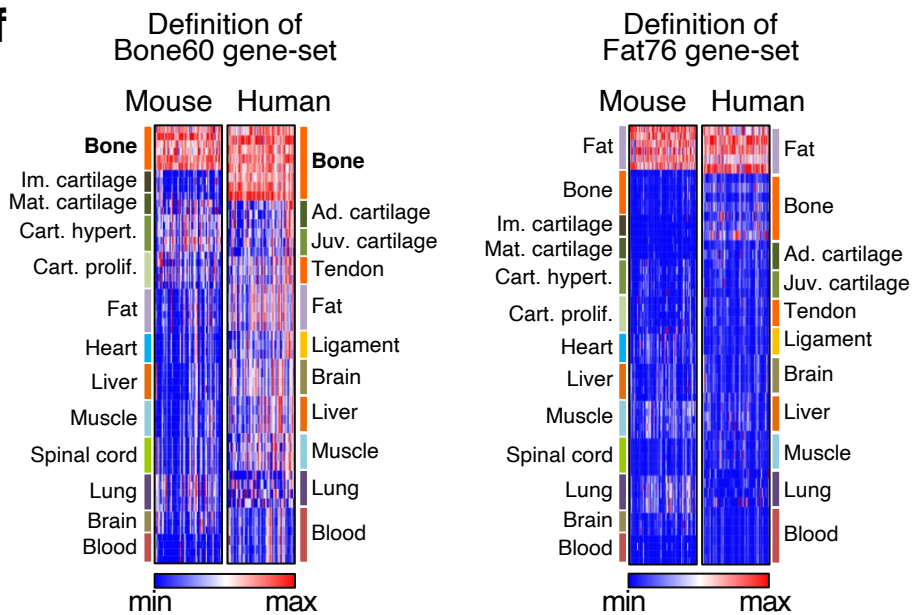

**Supplementary Figure 1: Vitamin C deficiency impairs bone volume and bone quality in *Gulo* knockout mice.** **a** Experimental setup. **b** Whole body radiographic pictures (**b**) as well as Femur/tibia radiography and L5 spine micro-computed tomography ( $\mu$ CT) images (**c**) from *Gulo*<sup>-/-</sup> mice supplemented with VitC (VitC+) for 20 weeks, or VitC-supplemented for 15 weeks followed by VitC withdrawal for 5 weeks (VitC+/-). Wild type (WT) mice were used as additional control. **d** graphical illustration and detailed listing of  $\mu$ CT analysis for L5 spine; BV, bone volume; TV, total volume; Tb.N., trabecular number; Tn.Th., trabecular thickness; Tb.Sp., trabecular separation; Conn.D., connectivity density; SMI, structure model index. **e** Three-point bending test of femurs in groups indicated in (**a**). Max defl., maximum deflection; Stiffn., stiffness. **f** Gene expression heatmap showing tissue-selective Bone60 and Fat76 gene-sets generated by analyzing 47 human and 59 mouse RNA-seq datasets. Graphs represent mean  $\pm$  SD. \* $p$ <0.05; \*\*\* $p$ <0.001; One-way ANOVA with Tukey's multiple comparison tests (**d,e**). DESeq-2 was used for the analysis of (**f**) using standard settings and batch correction. In (**d**),  $n=14$  for WT,  $n=11$  for VitC+ and  $n=9$  for VitC+/-; in (**e**),  $n=5$  for WT & VitC+ and  $n=4$  for VitC+/-; all samples were derived from biologically independent animals. Source data as well as exact  $p$ -values for all comparisons in (**d,e**) are provided in the Source Data File.

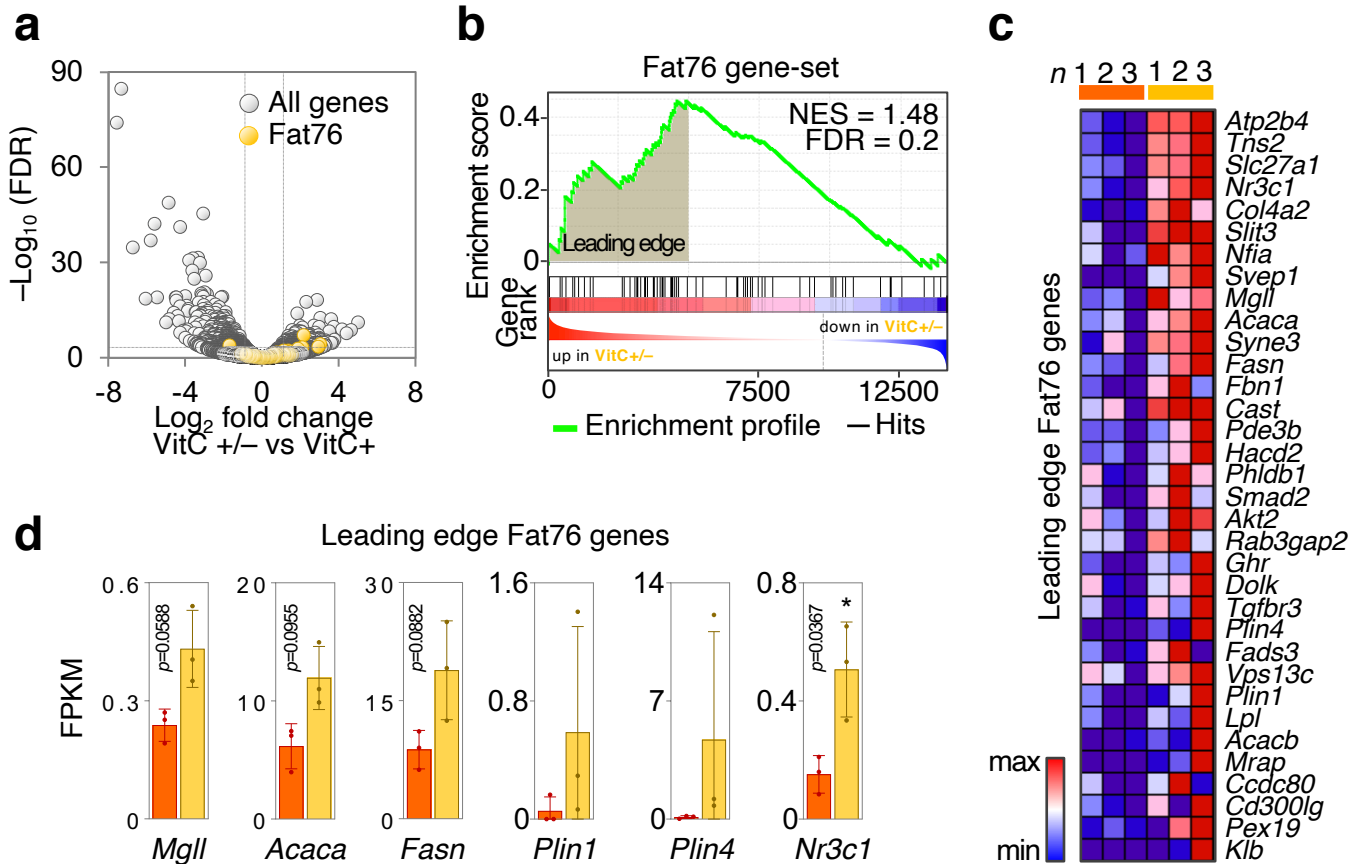

**Supplementary Figure 2: Vitamin C deprivation does not diminish the expression of adipogenic marker genes.** **a** Volcano plot and **b** GSEA analysis of the Fat76 gene-set in VitC+/- versus VitC+ RNA-seq data from *Gulo*<sup>-/-</sup> femurs; NES, normalized enrichment score; FDR, false discovery rate. **c,d** Heatmap and gene expression bar charts depict leading-edge genes. Bar graphs represent mean  $\pm$  SD. \* $p < 0.05$ ; FDR adjusted Wald test (**a**), FDR-adjusted two-tailed, unpaired t-tests (**d**);  $N=3$  per group from biologically independent animals (**d**). Source data are provided as a Source Data File.

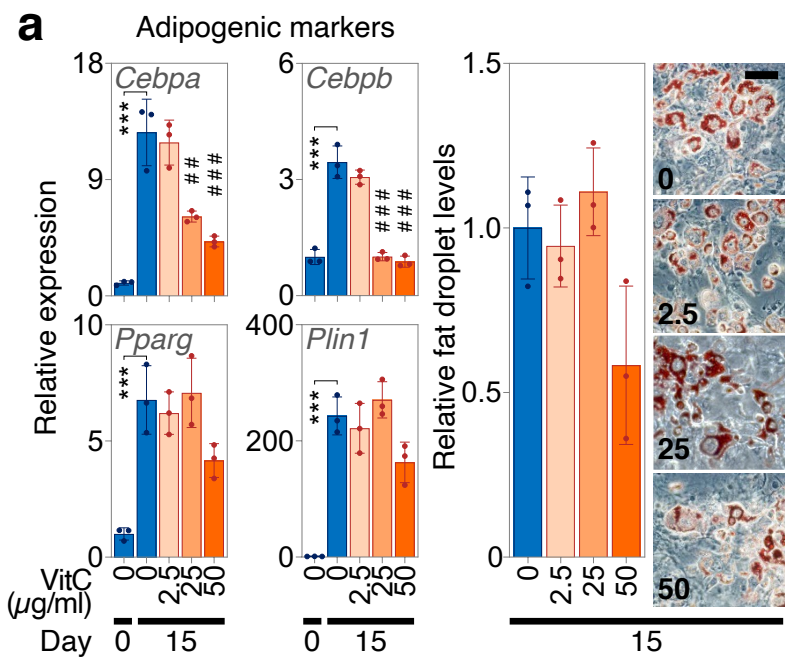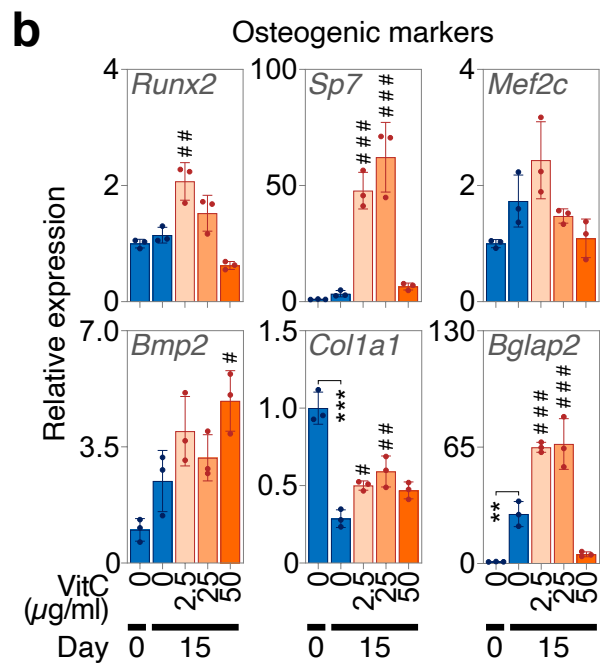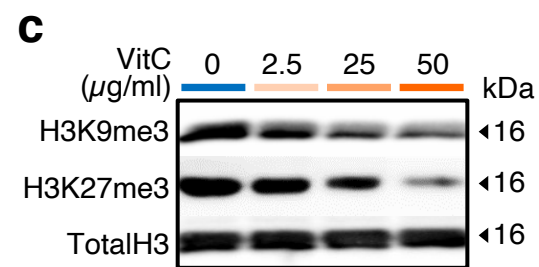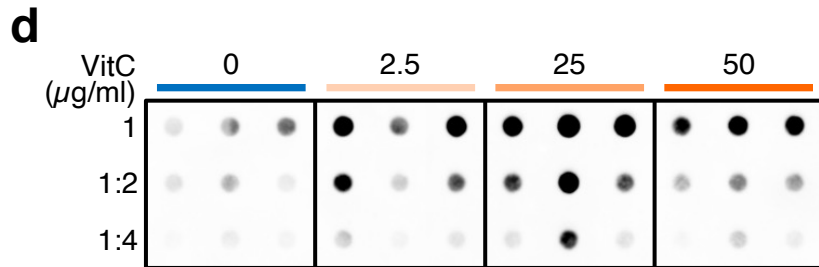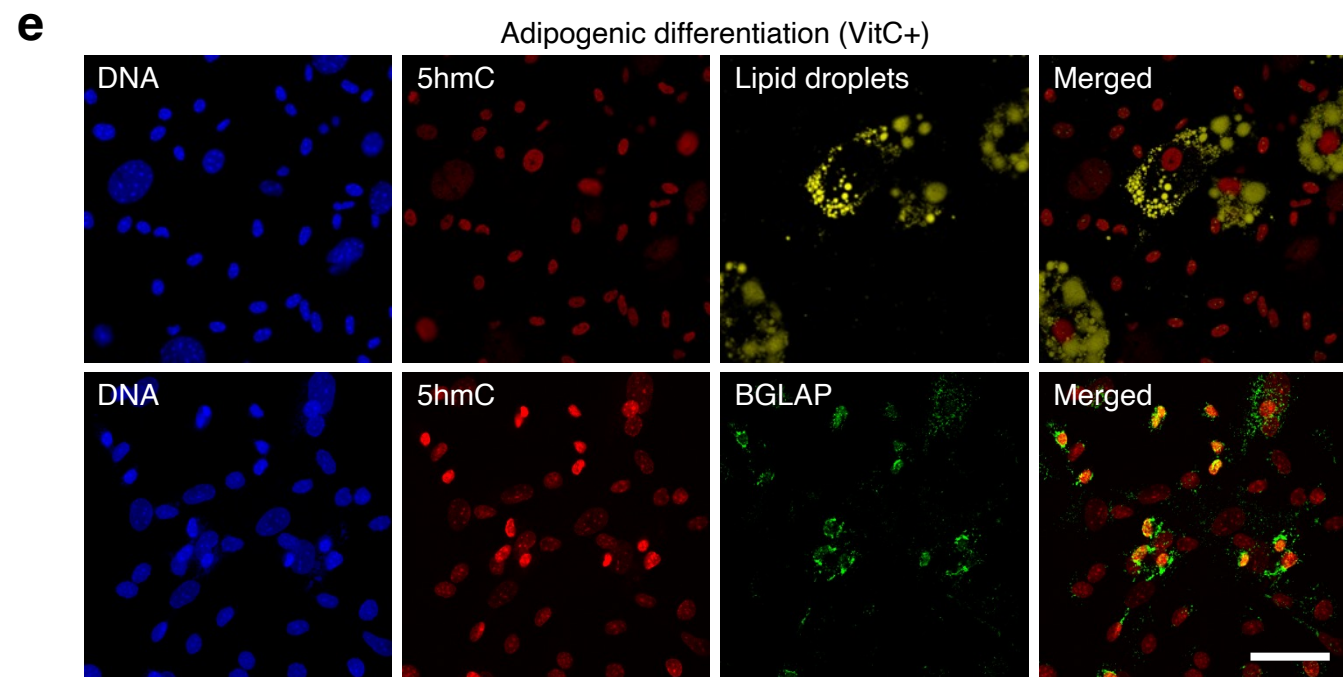

**Supplementary Figure 3: Adipose lineage differentiation does not require Vitamin C.** **a** Adipogenic markers gene expression and fat droplet levels in mouse BMSCs differentiated to adipocytes in the presence or absence of varying VitC concentrations. **b** Osteogenic markers gene expression in the same cultures as in (a). **c** H3K9me3 and H3K27me3 western blot. **d** 5hmC dot blot in adipocyte cultures at D15 of differentiation with or without varying concentrations of VitC. **e** Immunofluorescence of 5hmC and BGLAP as well as *LipidSpot*-fluorescent fat droplet detection in VitC (25 µg/ml) - treated adipocyte cell cultures differentiated from BMSCs at d15. Note that BGLAP-positive cells show increased 5hmC levels. In **a** and **e** scale bar represents 50 µm. Bar graphs represent mean ± SD, \*\* $p < 0.01$ ; \*\*\* $p < 0.001$  comparing groups to VitC 0 at d0; # $p < 0.05$ ; ## $p < 0.01$ ; ### $p < 0.001$  comparing groups to VitC 0 at d15; one-way ANOVA with Tukey's multiple comparison tests;  $n = 3$  per group from cells derived from biologically independent animals (a,b). Source data as well as exact  $p$ -values for all comparisons in (a,b) are provided in the Source Data File.

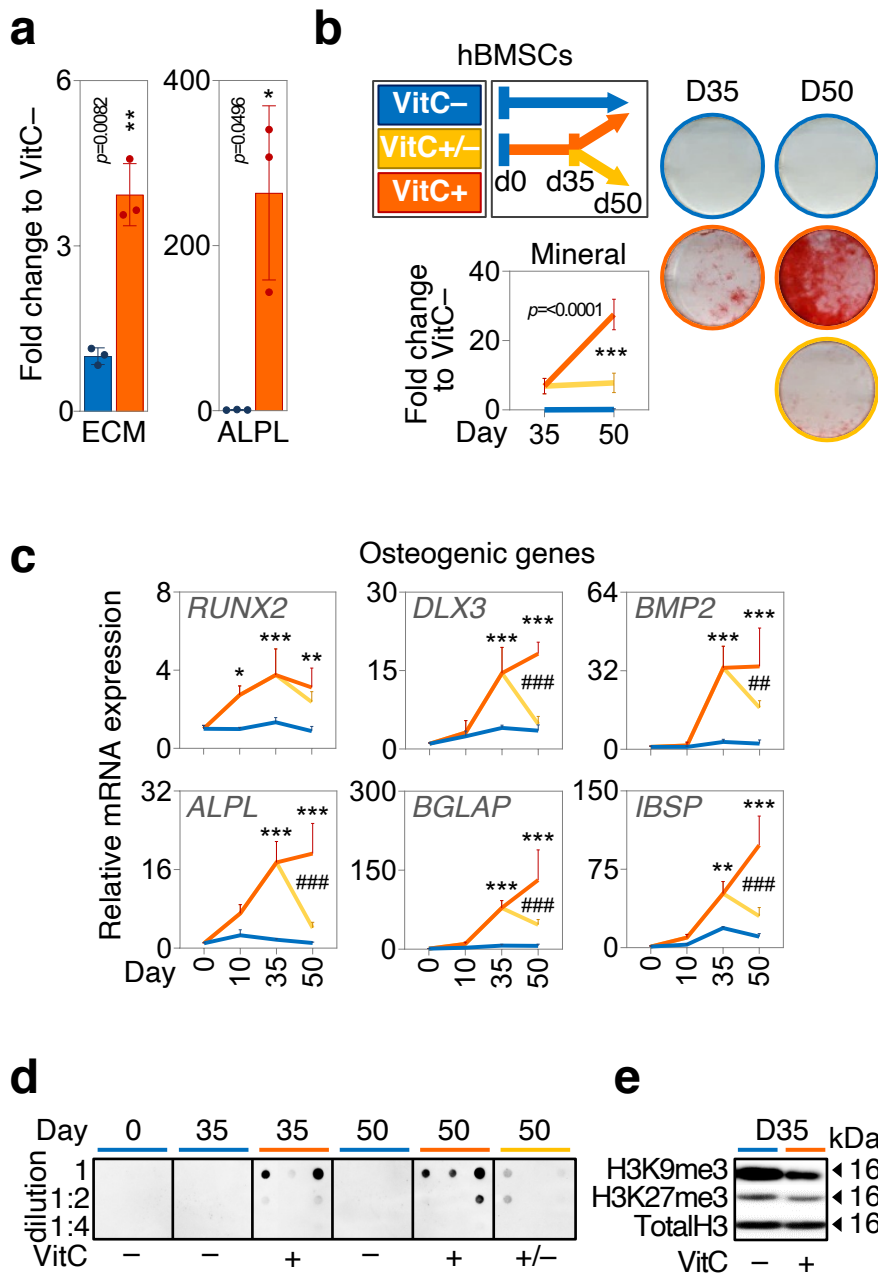

**Supplementary Figure 4: Vitamin C controls osteogenic differentiation of human BMSCs.** **a** Extracellular matrix (ECM) deposition and ALPL activity at day 10 in human BMSCs with or without VitC. **b** Experimental setup for (b-d) as well as mineral deposition with or without VitC at day 35 and after removal of VitC from day 35 to day 50. **c** mRNA expression of osteoblast markers in hBMSCs with or without VitC, or cultures in which VitC was removed starting at day 35 (VitC+/-). **d** 5hmC dot blot in hBMSCs with or without VitC and at day 35 and after removal of VitC from day 35 to day 50. **e** H3K9me3 and H3K27me3 western blot in hBMSCs with or without VitC at day 35. Graphs represent mean  $\pm$  SD, \* $p$ <0.05; \*\* $p$ <0.01; \*\*\* $p$ <0.001. Paired two-tailed  $t$ -test in (a), two-way ANOVA with Tukey's multiple comparison tests in (b,c); in (c) \* marked significances represent comparisons between VitC+ vs VitC- at the indicated time point and # significances represent comparisons between D50 VitC+ vs D50 VitC+/- .  $N=3$  per group from cells derived from biologically independent donors (a-c). Source data as well as exact  $p$ -values for all comparisons in (c) are provided in the Source Data File.

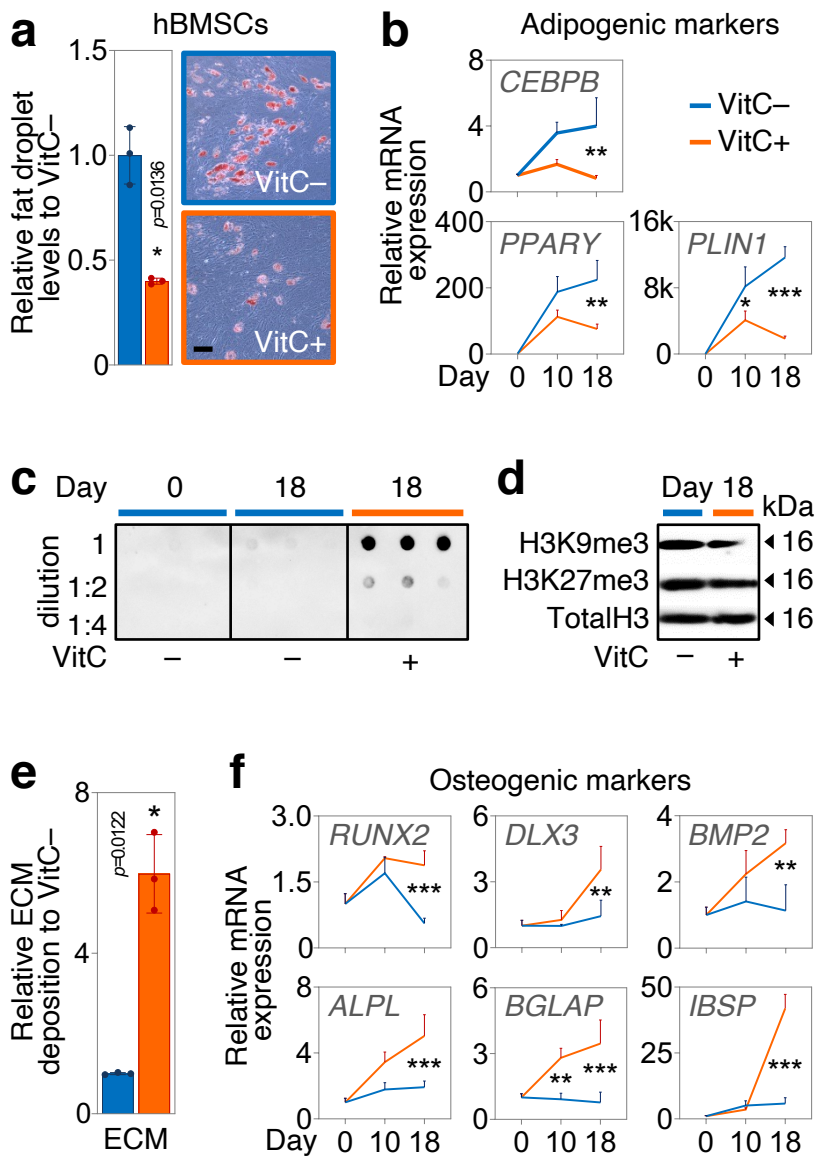

**Supplementary Figure 5: Vitamin C is dispensable for adipogenic differentiation of human BMSCs.** **a** Fat droplet levels at day 18 in human BMSCs differentiated to adipocytes with or without VitC, scalebar 100  $\mu$ m. **b** mRNA expression of adipogenic genes in hBMSCs differentiated to adipocytes with or without VitC. **c,d** 5hmC dot blot and H3K9me3 and H3K27me3 western blot in adipocytes differentiated from hBMSCs with or without VitC **e** ECM deposition in to adipocytes differentiating hBMSCs treated with or without VitC at day 10. **f** mRNA expression of osteogenic genes in hBMSCs differentiated to adipocytes with or without VitC. Graphs represent mean  $\pm$  SD, \* $p$ <0.05; \*\* $p$ <0.01; \*\*\* $p$ <0.001. Paired two-tailed  $t$ -test in (a,e), two-way ANOVA with Tukey's multiple comparison tests showing direct comparisons for each time point in (b,f).  $N=3$  per group from cells derived from biologically independent donors (a,b,e,f). Source data as well as exact  $p$ -values for all comparisons in (b,f) are provided in the Source Data File.



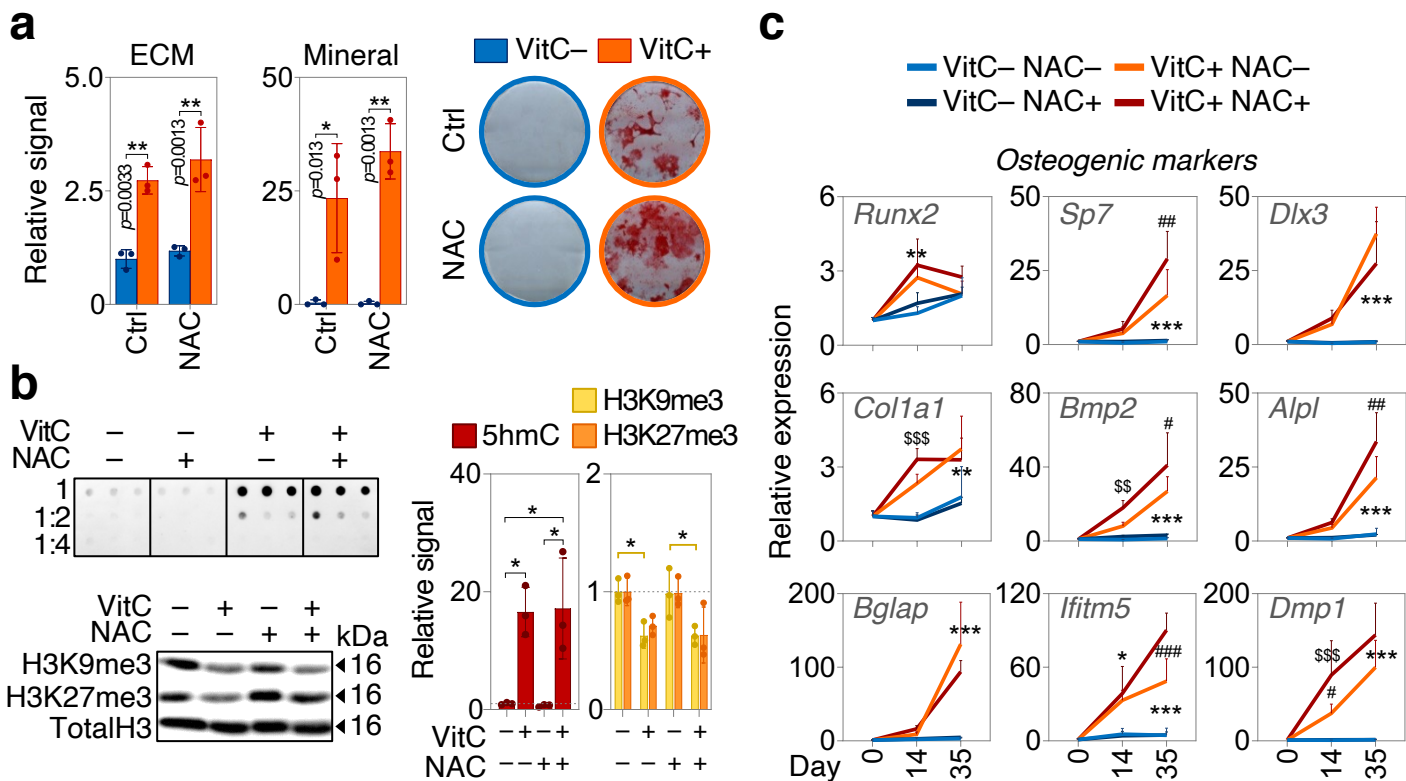

**Supplementary Figure 6: The antioxidant function of Vitamin C is independent from its pro-osteogenic role.** **a** ECM deposition at day 15 and ECM mineralization at day 35 in mBMSCs treated with or without VitC and with or without 3mM N-acetylcysteine (NAC). **b** Effects of 3 mM NAC on 5hmC levels as shown by dot blot as well as on H3K9me3 and H3K27me3 amounts as shown by western blot including quantification by relative densitometry of the blots. **c** mRNA expression of osteogenic markers in mBMSCs exposed to 3 mM NAC during osteogenic differentiation. Graphs represent mean  $\pm$  SD, \* $p$ <0.05; \*\* $p$ <0.01; \*\*\* $p$ <0.001; # $p$ <0.05; ### $p$ <0.01; #### $p$ <0.001; \$\$\$ $p$ <0.01; \$\$\$\$ $p$ <0.001. In (c) \* tests VitC- NAC- vs VitC+ NAC-; # tests VitC+ NAC- vs VitC+ NAC+; \$ tests VitC- NAC- vs VitC+ NAC+ at the corresponding time points. Two-way ANOVA (a,b histones, c) or one-way ANOVA (b, 5hmC) with Tukey's multiple comparison tests.  $N=3$  per group from cells derived from biologically independent animals (a-c). Source data as well as exact  $p$ -values for all comparisons in (b,c) are provided in the Source Data File.

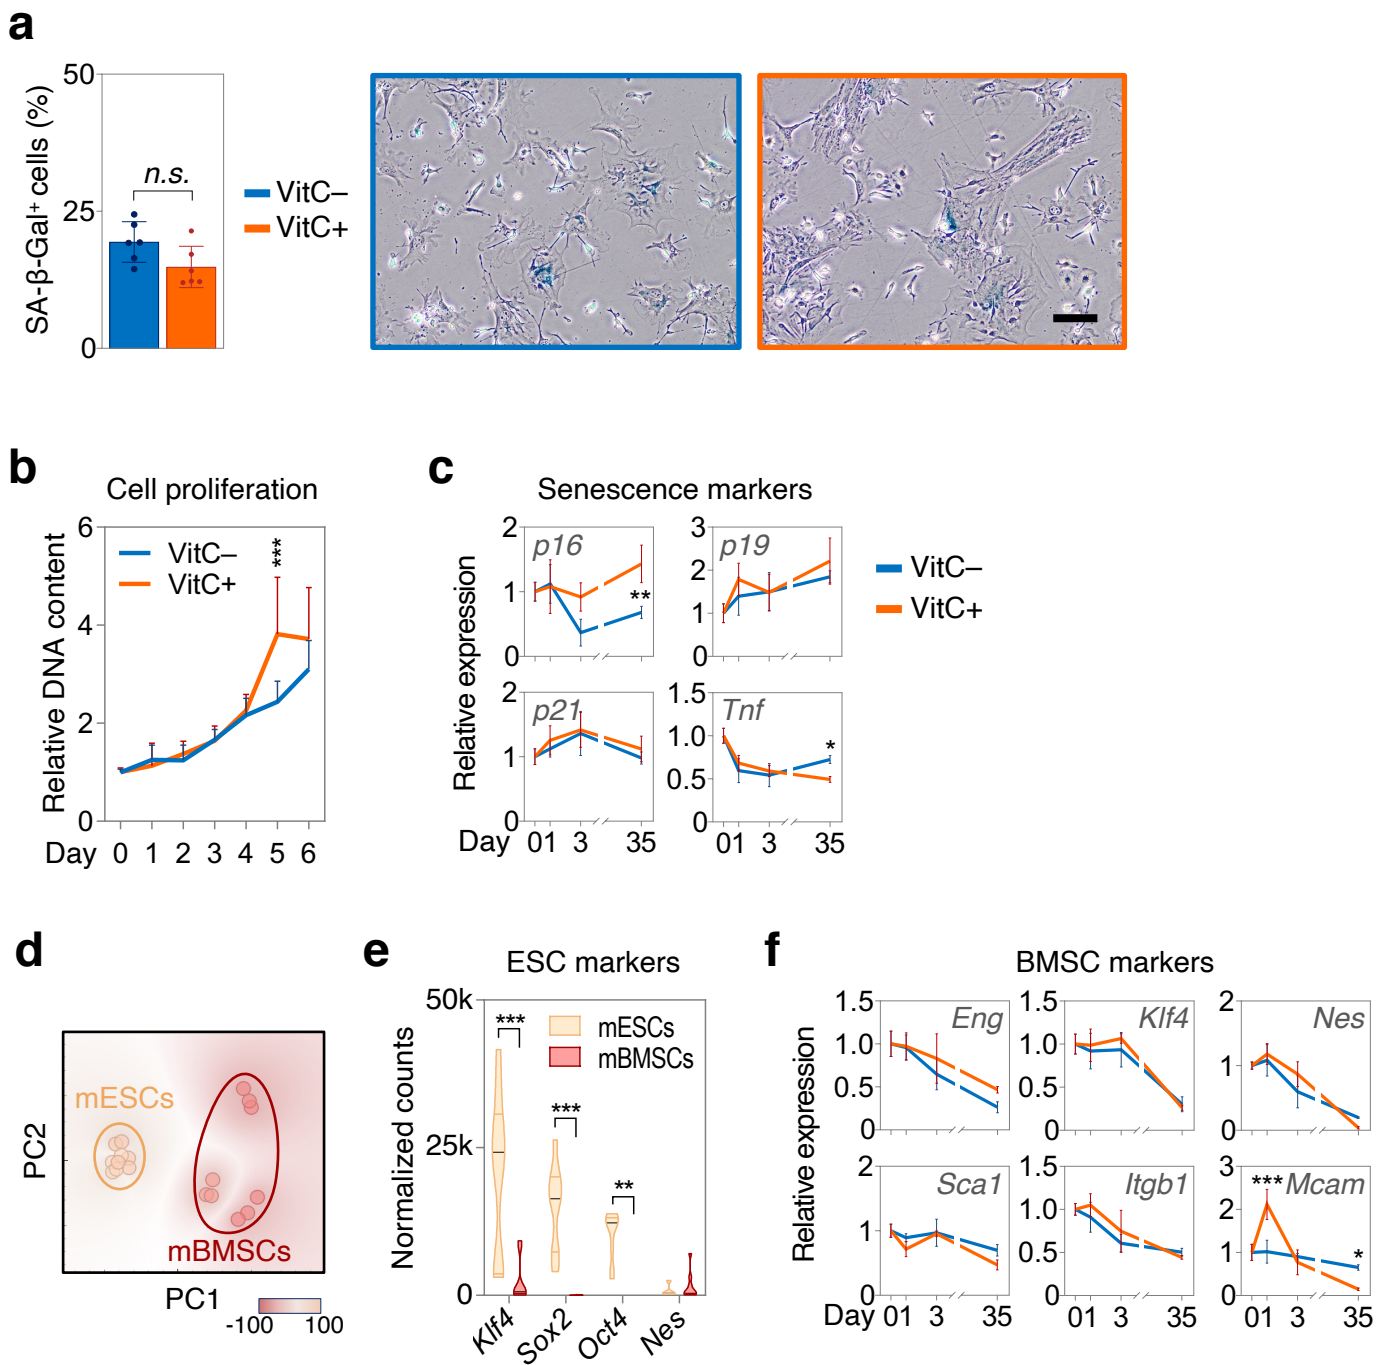

**Supplementary Figure 7: Cellular senescence and stemness markers of BMSCs are largely unaffected by Vitamin C.**

**a** Proportion of mBMSCs positive for senescence-associated  $\beta$ -Galactosidase (SA- $\beta$ -Gal) with or without VitC at day 3 and representative images; scale bar 50  $\mu$ m. **b** Cell proliferation profile of mBMSCs treated with or without VitC. **c** mRNA expression of senescence markers in mBMSCs treated with or without VitC. **d** Principal component (PC) analysis comparing global mRNA expression data (RNA-Seq) from mouse embryonic stem cells (mESCs) and mBMSCs. **e** RNA-Seq expression of ESCs markers in mESCs vs mBMSCs. **f** mRNA expression of BMSC markers in mBMSCs treated with or without VitC. Graphs represent mean  $\pm$  SD, \* $p$ <0.05; \*\* $p$ <0.01; \*\*\* $p$ <0.001. Two-way ANOVA with Sidak's multiple comparison tests for (b,c,e,f) and unpaired t test for (a).  $N=6$  (a) &  $n=8$  (b) per group from independent experiments,  $n=3$  (c,f) &  $n=9$  (e) per group from biological independent animals. Source data as well as exact  $p$ -values for all comparisons in (a-c,e,f) are provided in the Source Data File.

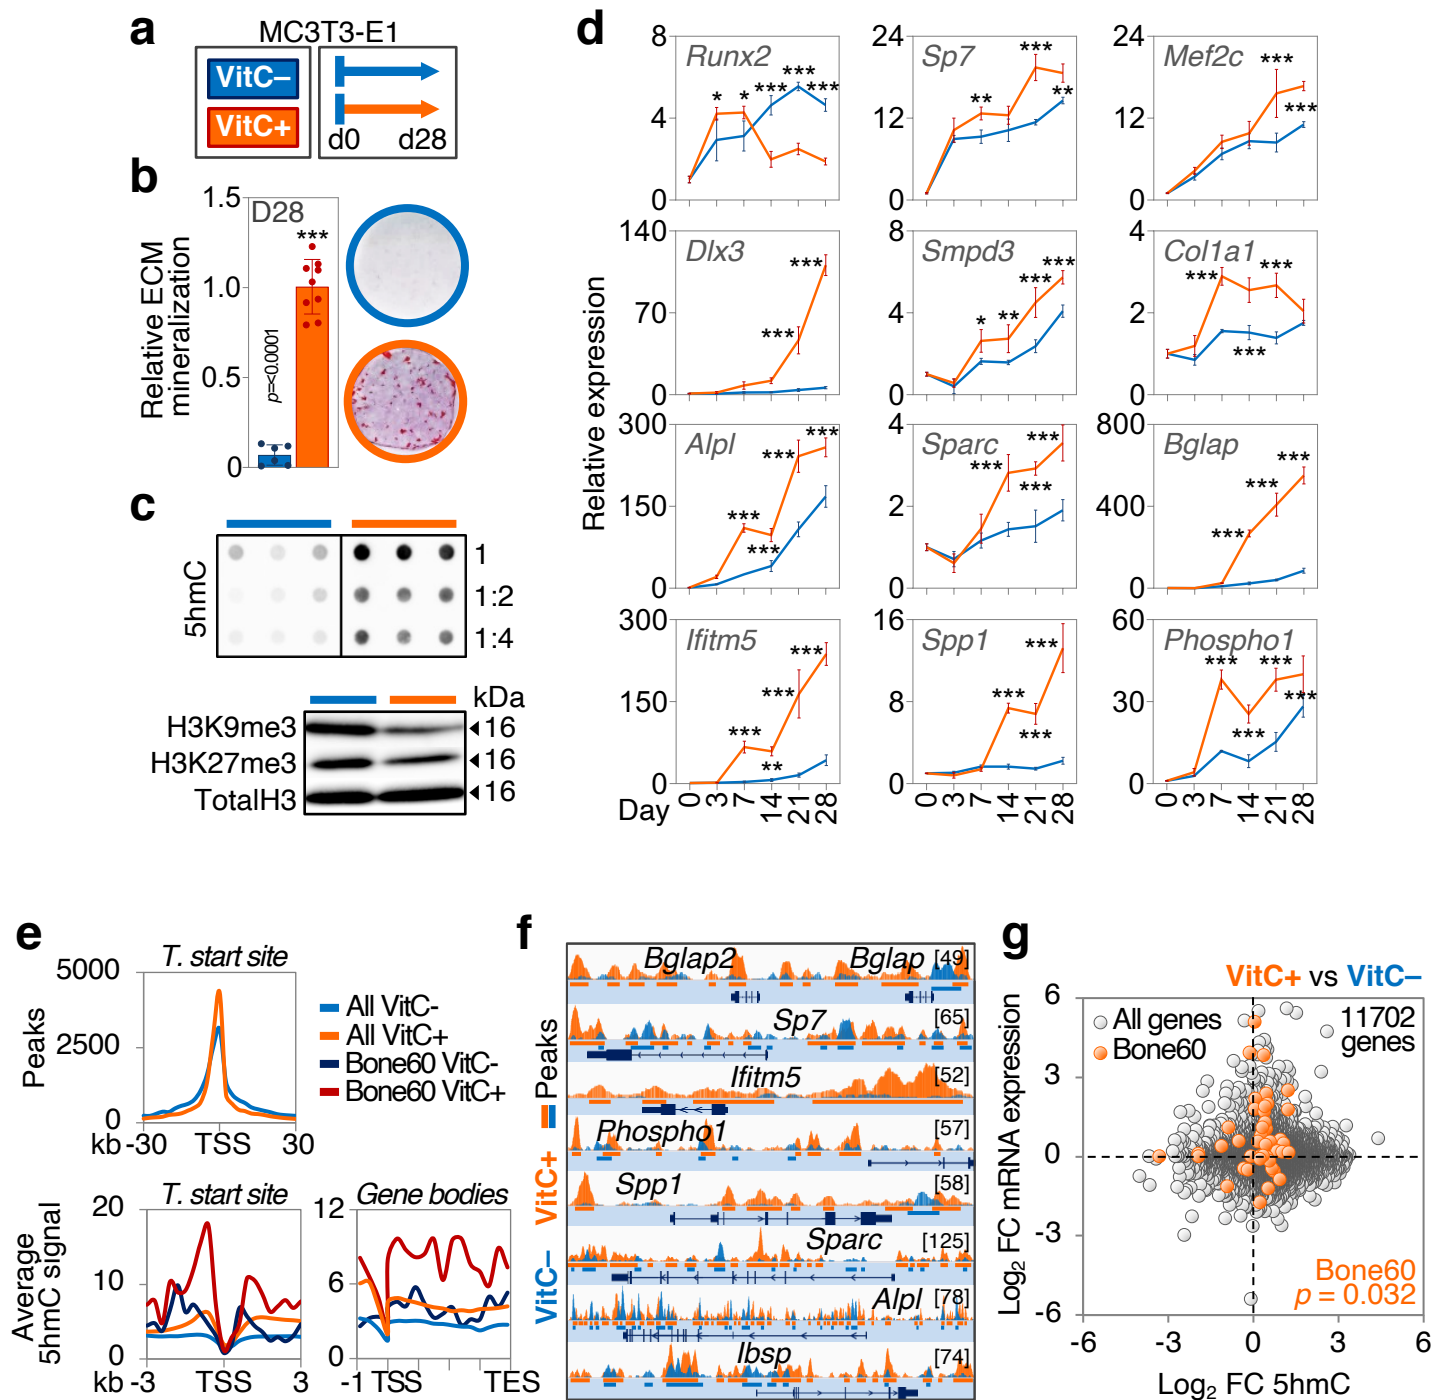

**Supplementary Figure 8: Differentiation of MC3T3-E1 osteoblasts with Vitamin C involves chromatin relaxation and selective hydroxymethylation of osteogenic loci.**

**a** Experimental setup. **b** Extracellular matrix (ECM) mineralization. **c** 5hmC dot blot as well as H3K9me3 and H3K27me3 western blot during MC3T3-E1 differentiation with or without VitC. **d** Osteogenic gene expression in VitC-untreated or -treated MC3T3-E1 osteoblasts. **e** hMeDIP-seq analysis of MC3T3-E1 showing 5hmC peak number around transcriptional start sites (TSS), average 5hmC signal around TSS or in gene bodies for all genes or for the Bone60 gene-set; TES, transcriptional end site. **f** Overlaid 5hmC peak occupancy comparing VitC- and VitC+ groups near Bone60 genes; [value]=max peak scale. **g** Correlation between gene expression and 5hmC occupancy (TSS +/-30 kb) in VitC+ vs VitC- treated cells; FC, fold change. Bar and line graphs represent mean  $\pm$  SD; \* $p < 0.05$ ; \*\* $p < 0.01$ ; \*\*\* $p < 0.001$ . Unpaired two-sided *t*-test (**b**), two-way ANOVA with Sidak's multiple comparison tests (**d**, groups were compared at each time point), two-sided Fishers exact test (**g**).  $N=9$  for VitC+ and  $n=6$  for VitC- in (**b**),  $n=3$  in (**d**); all data is derived from independent experiments. Source data as well as exact  $p$ -values for all comparisons in (**d**) are provided in the Source Data File.

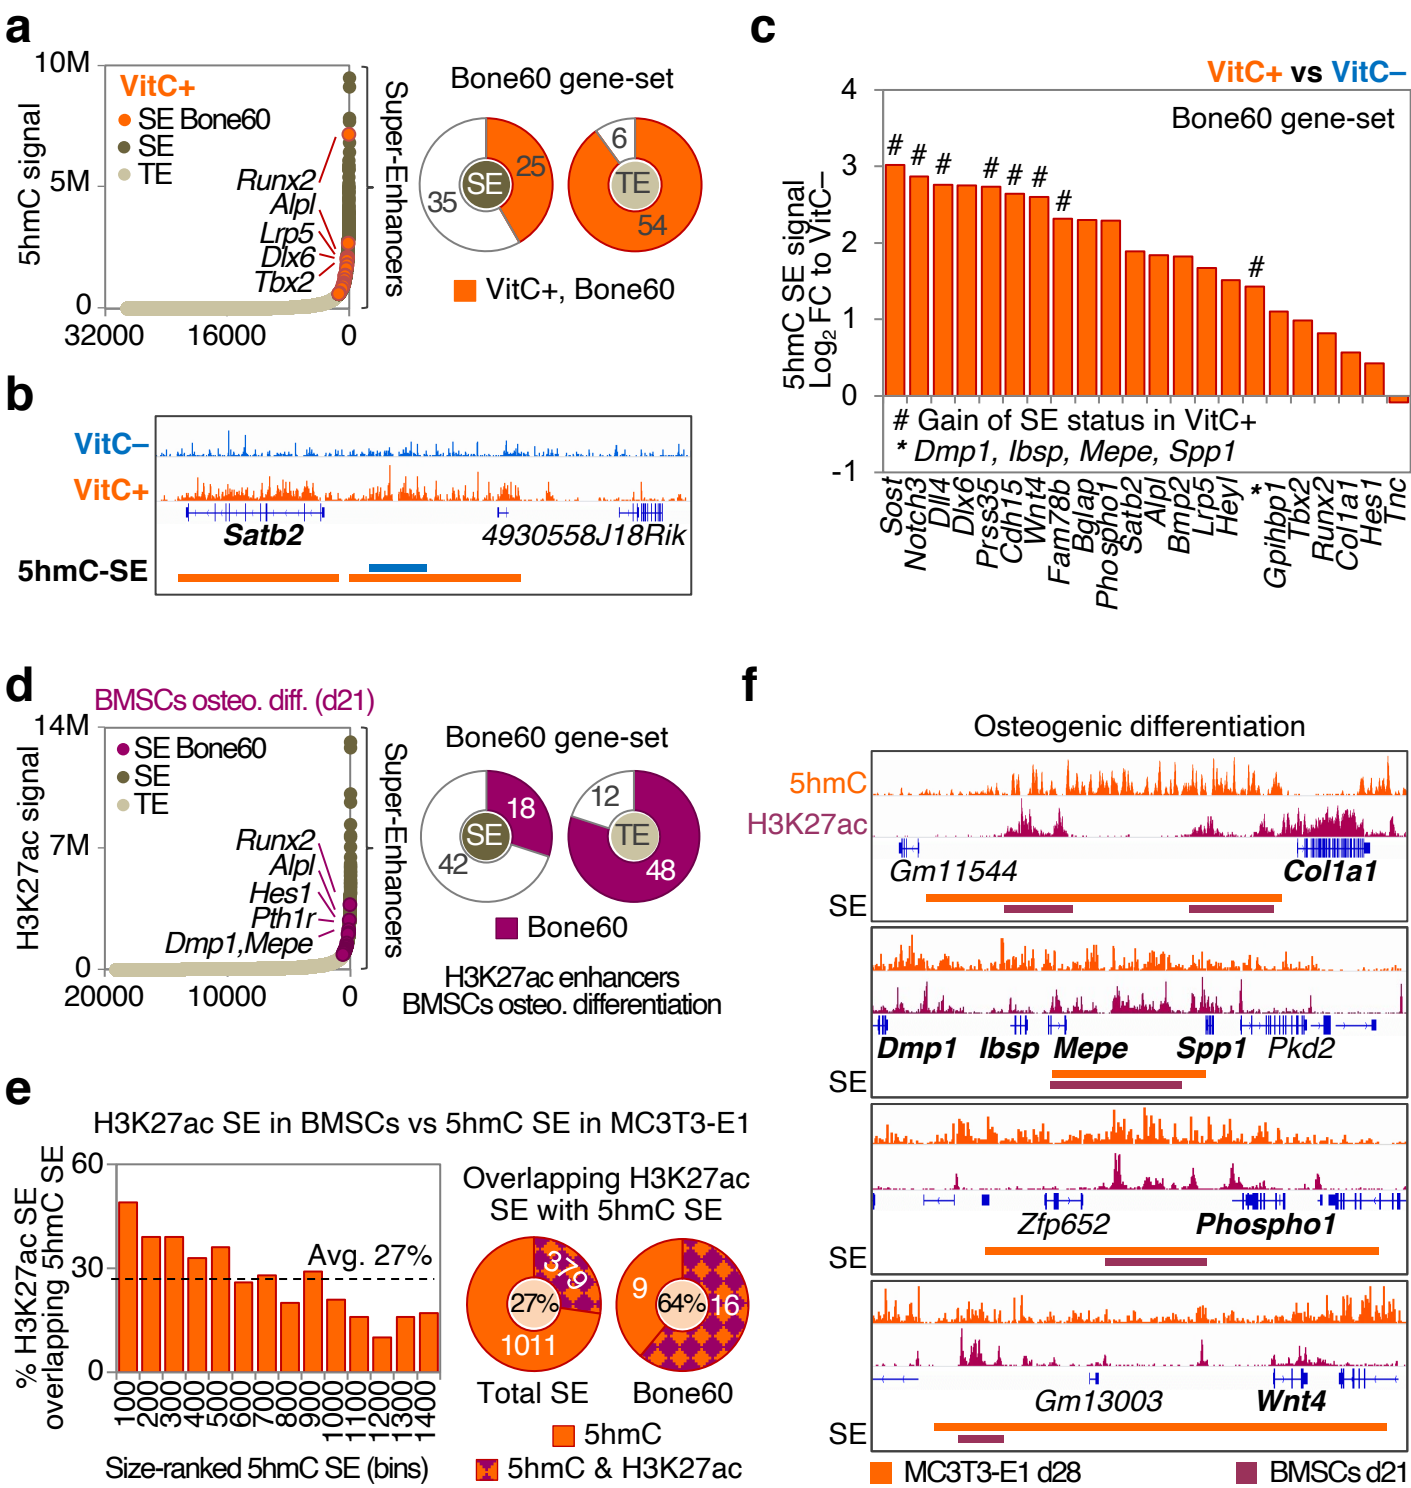

**Supplementary Figure 9: Vitamin C-dependent, distal 5hmC peaks in MC3T3-E1 co-localize with H3K27ac-marked super-enhancers in osteoblasts derived from mouse BMSCs.** **a** Super-enhancer (SE) based clustering of 5hmC peaks with *Runx2* as the highest ranking Bone60 gene and number of Bone60 genes associated with 5hmC-SE and 5hmC-typical enhancer (TE). **b** Example of 5hmC-SE. **c** New formation of 5hmC-SE and ranked increase in 5hmC signal at 5hmC-SE in VitC treated vs untreated cells. **d** H3K27ac SE analysis in osteogenic differentiated BMSCs with *Runx2* as the highest ranking Bone60 gene and number of H3K27ac enhancers and SE associated with Bone60 genes. **e** Amount of 5hmC SE from VitC+ MC3T3-E1 cells overlapping with H3K27ac SE from osteogenic BMSCs and count of 5hmC SE-positive Bone60 genes in MC3T3-E1 cells with overlapping H3K27ac SE in BMSCs. **f** Representative selection of Bone60 genes comparing 5hmC SE and H3K27ac SE in differentiated osteoblasts. Source data are provided as a Source Data File.

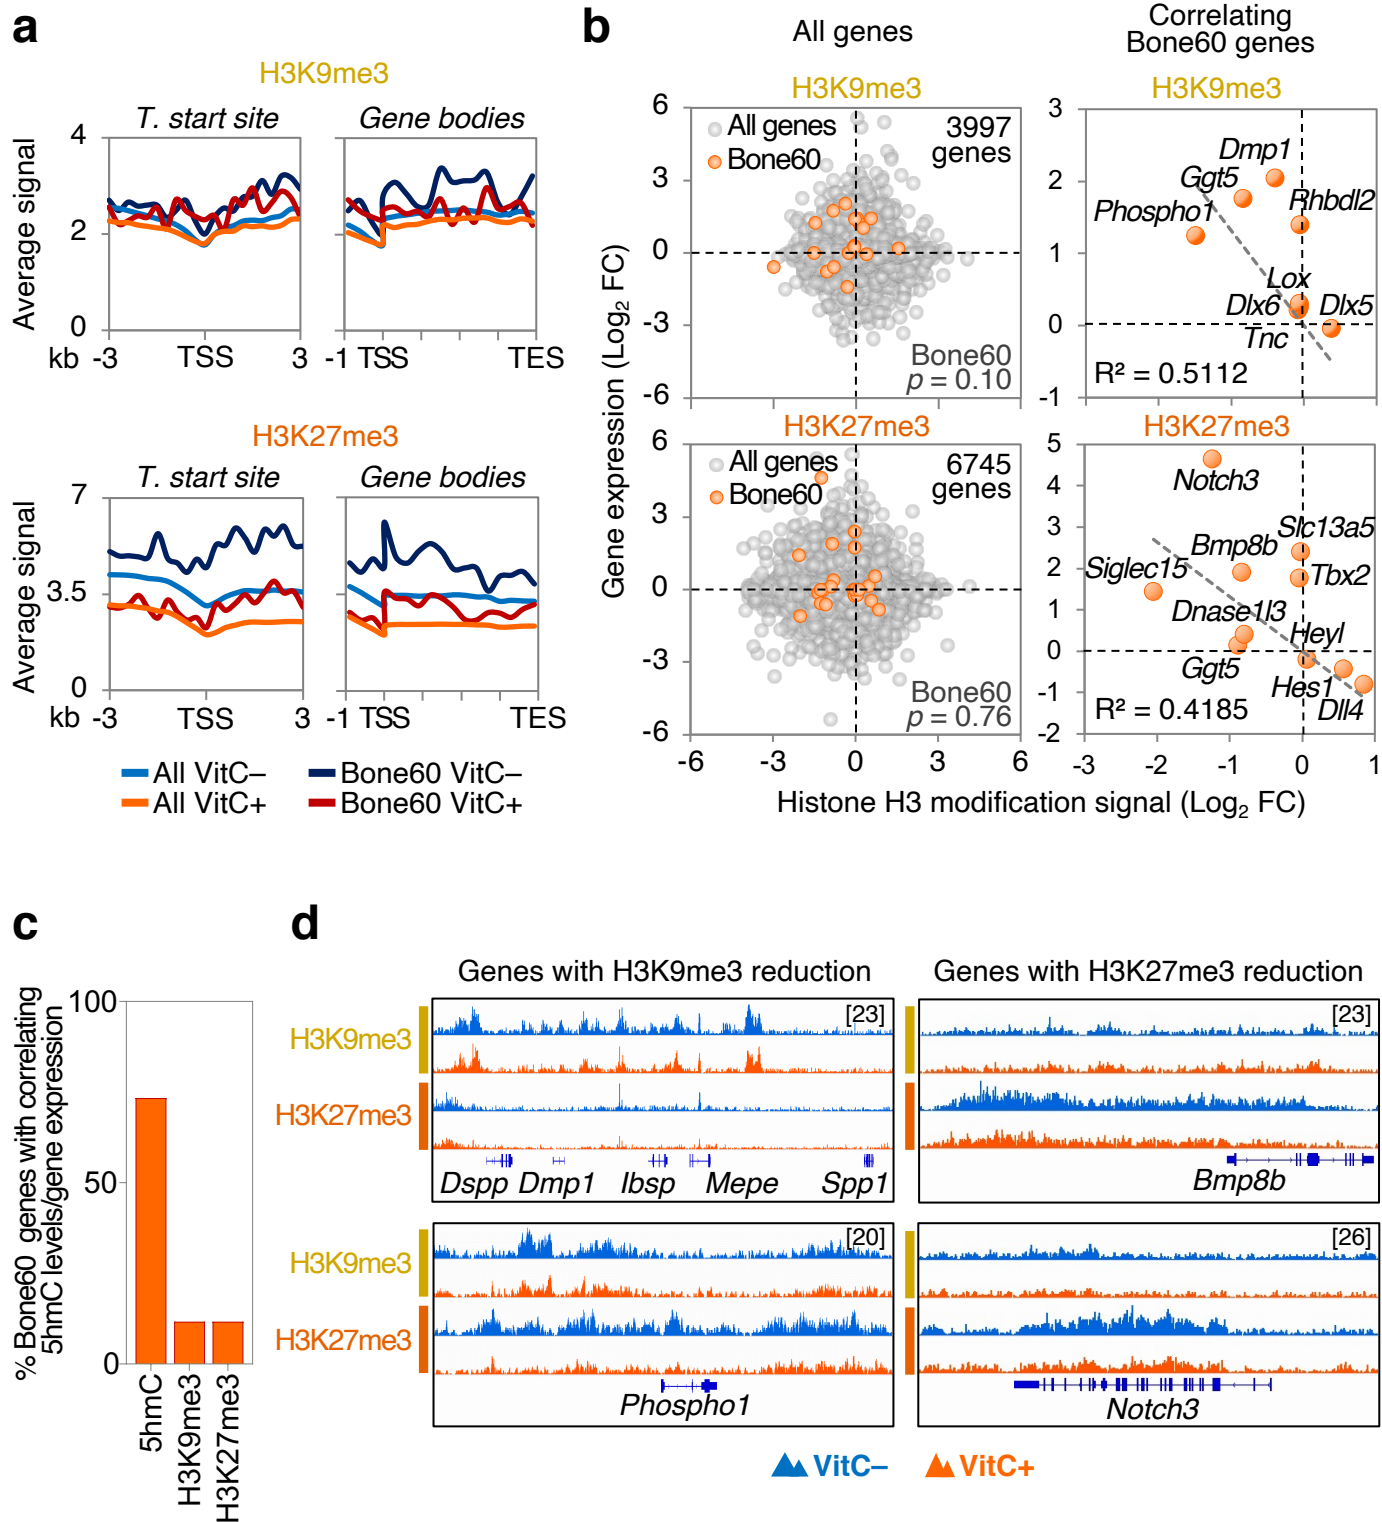

**Supplementary Figure 10: Vitamin C affects selective Histone demethylation patterns at a subset of osteogenic genes.** **a** H3K9me3 and H3K27me3 ChIP-seq analysis of MC3T3-E1 cells treated with or without VitC showing average peak signals around transcription start site (TSS) or in gene bodies for all genes or for the Bone60 gene-set; TES, transcription end site. **b** Correlation between gene expression and H3K9me3 or H3K27me3 occupancy (TSS +/-30 kb) showing all genes and correlating Bone60 genes in VitC+ vs VitC- treated cells; FC, fold change. **c** Percentage of Bone60 genes where VitC dependent levels of shown epigenetic marks (TSS +/-30 kb) correlate with their mRNA expression. **d** H3K9me3 and H3K27me3 peak occupancy comparing VitC- and VitC+ groups near selected Bone60 genes; [value]=max peak scale. Two-sided Fishers exact test (**b**). Source data are provided as a Source Data File.

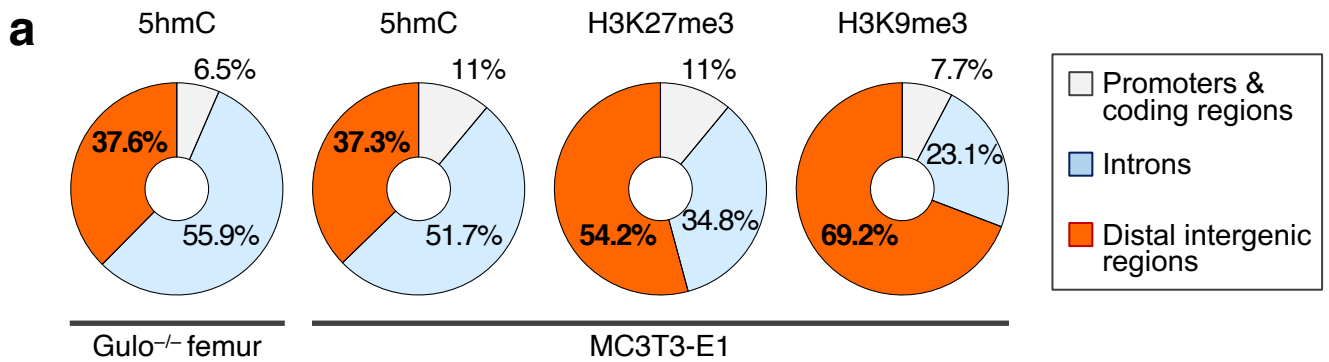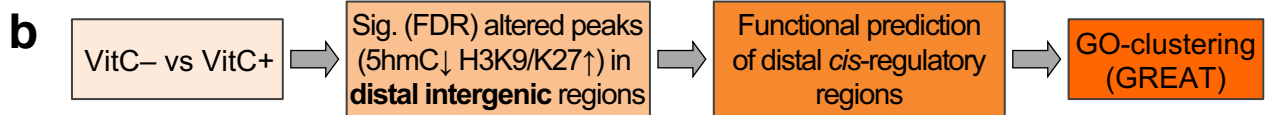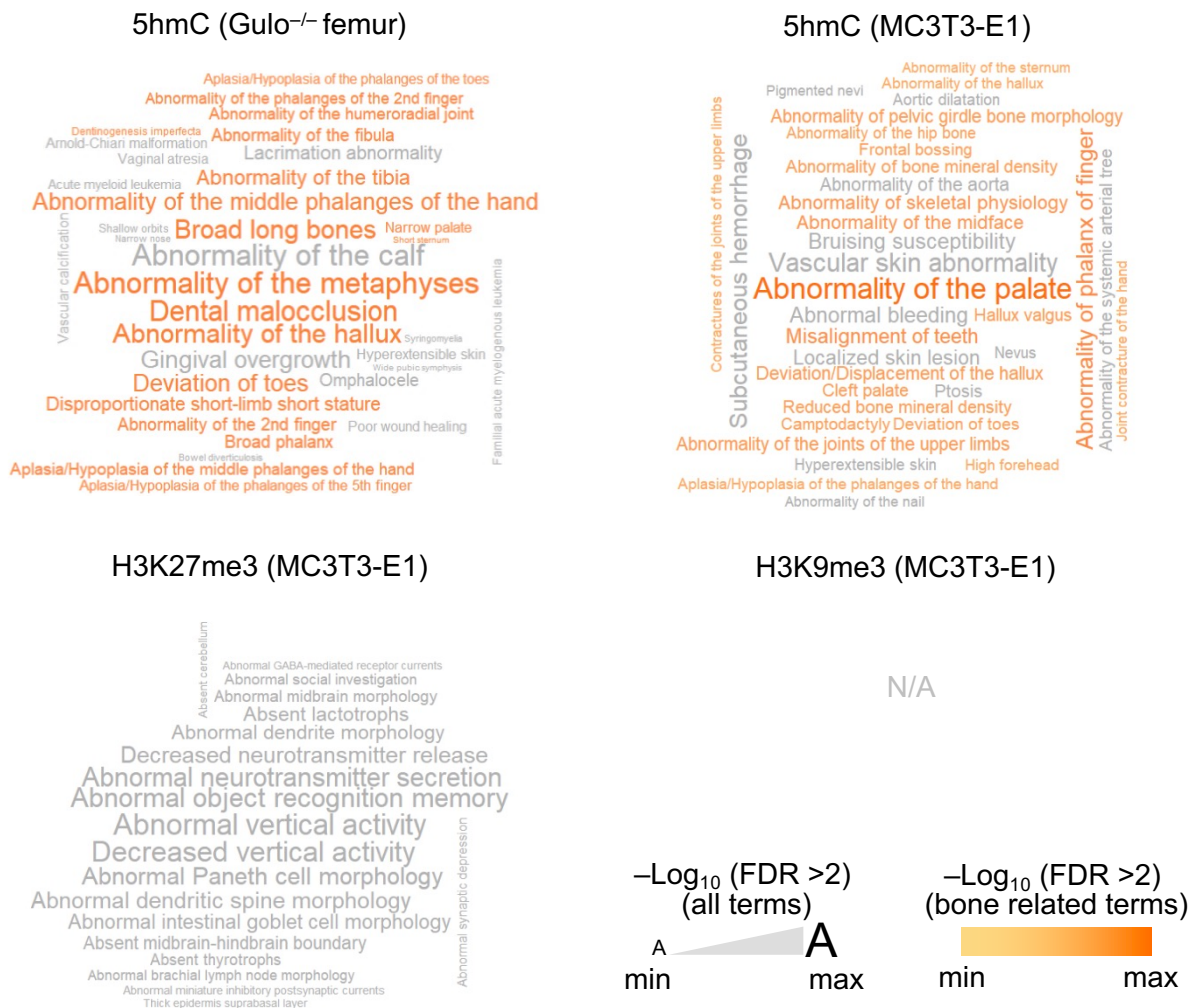

**Supplementary Figure 11: Vitamin C-sensitive, distal intergenic 5hmC peaks associate with genes linked to skeletal phenotypes.** **a** Genomewide peak distribution for shown epigenetic marks in VitC treated bone tissue and MC3T3-E1 osteoblasts. **b** Analysis pathway and word-cloud representation of GREAT-mediated GO-phenotypes for shown marks and substrates. FDR, false discovery rate. Source data are provided as a Source Data File.

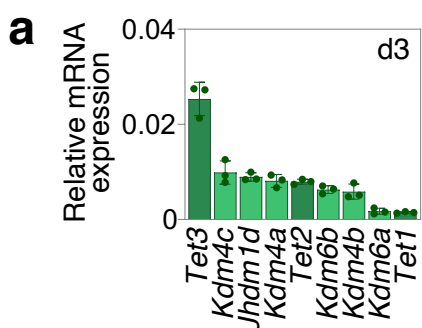

■ DNA demethylases

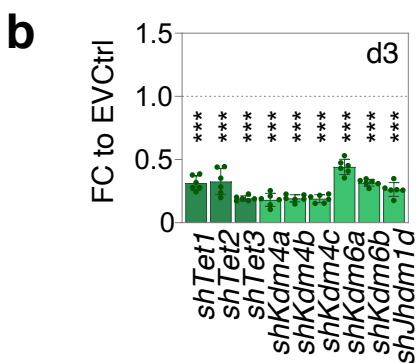

■ Histone demethylases

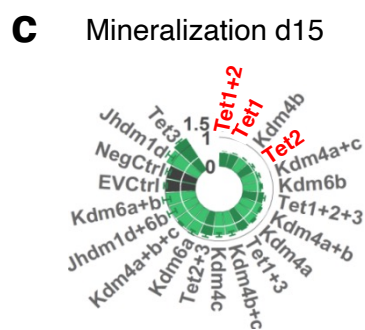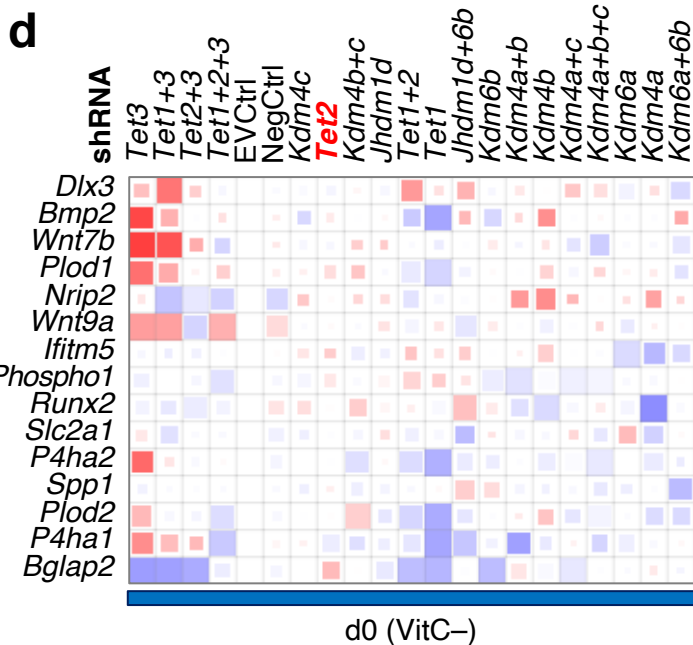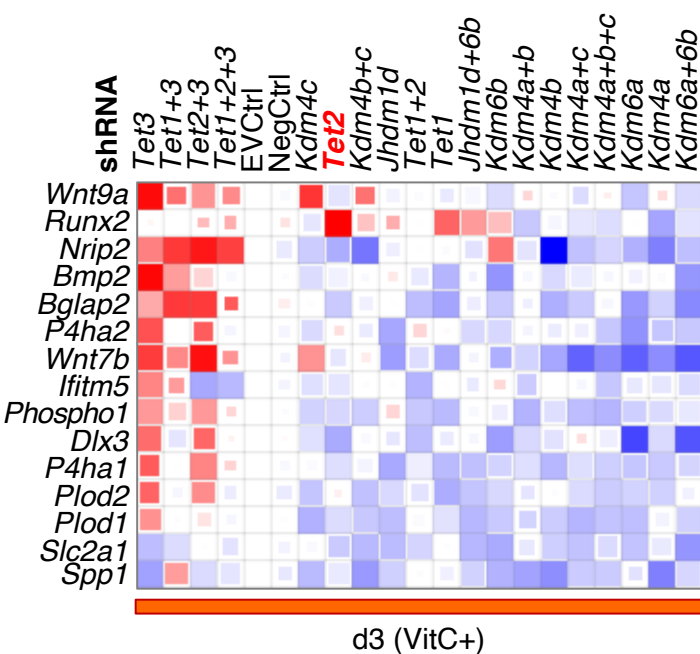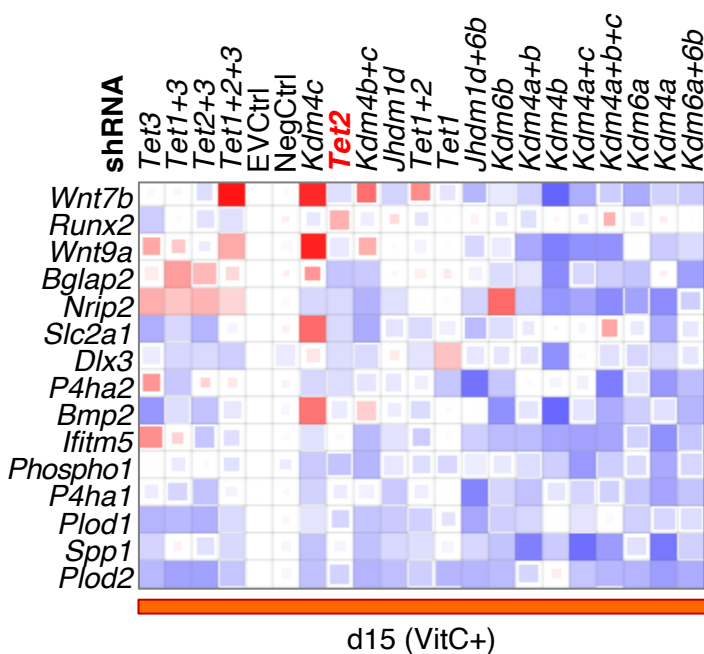

**Supplementary Figure 12: Histone demethylases and DNA hydroxymethylases are required during late stages of osteogenic differentiation.** **a** Ranked basal hydroxylases gene expression from MLO-A5 pre-osteocytes as shown by rt-qPCR data. **b** shRNA-mediated knockdown efficiencies at day 3. **c** Ranked ECM mineralization after hydroxylases shRNA knockdowns at day 15. **d** Two-way ranked osteoblastic gene expression after hydroxylases shRNA knockdowns in differentiating MLO-A5 cells. Bar graphs represent mean  $\pm$  SD; \*\*\* $p$ <0.001. One-way ANOVA with Dunnett's multiple comparison tests (**b**). Samples were compared to EVCtrl (**b,d**).  $N=3$  (**a,c**),  $n=3$ /tested shRNA (**b**), all from biological independent experiments. FC; fold change; EV, empty vector. Source data are provided as a Source Data File.



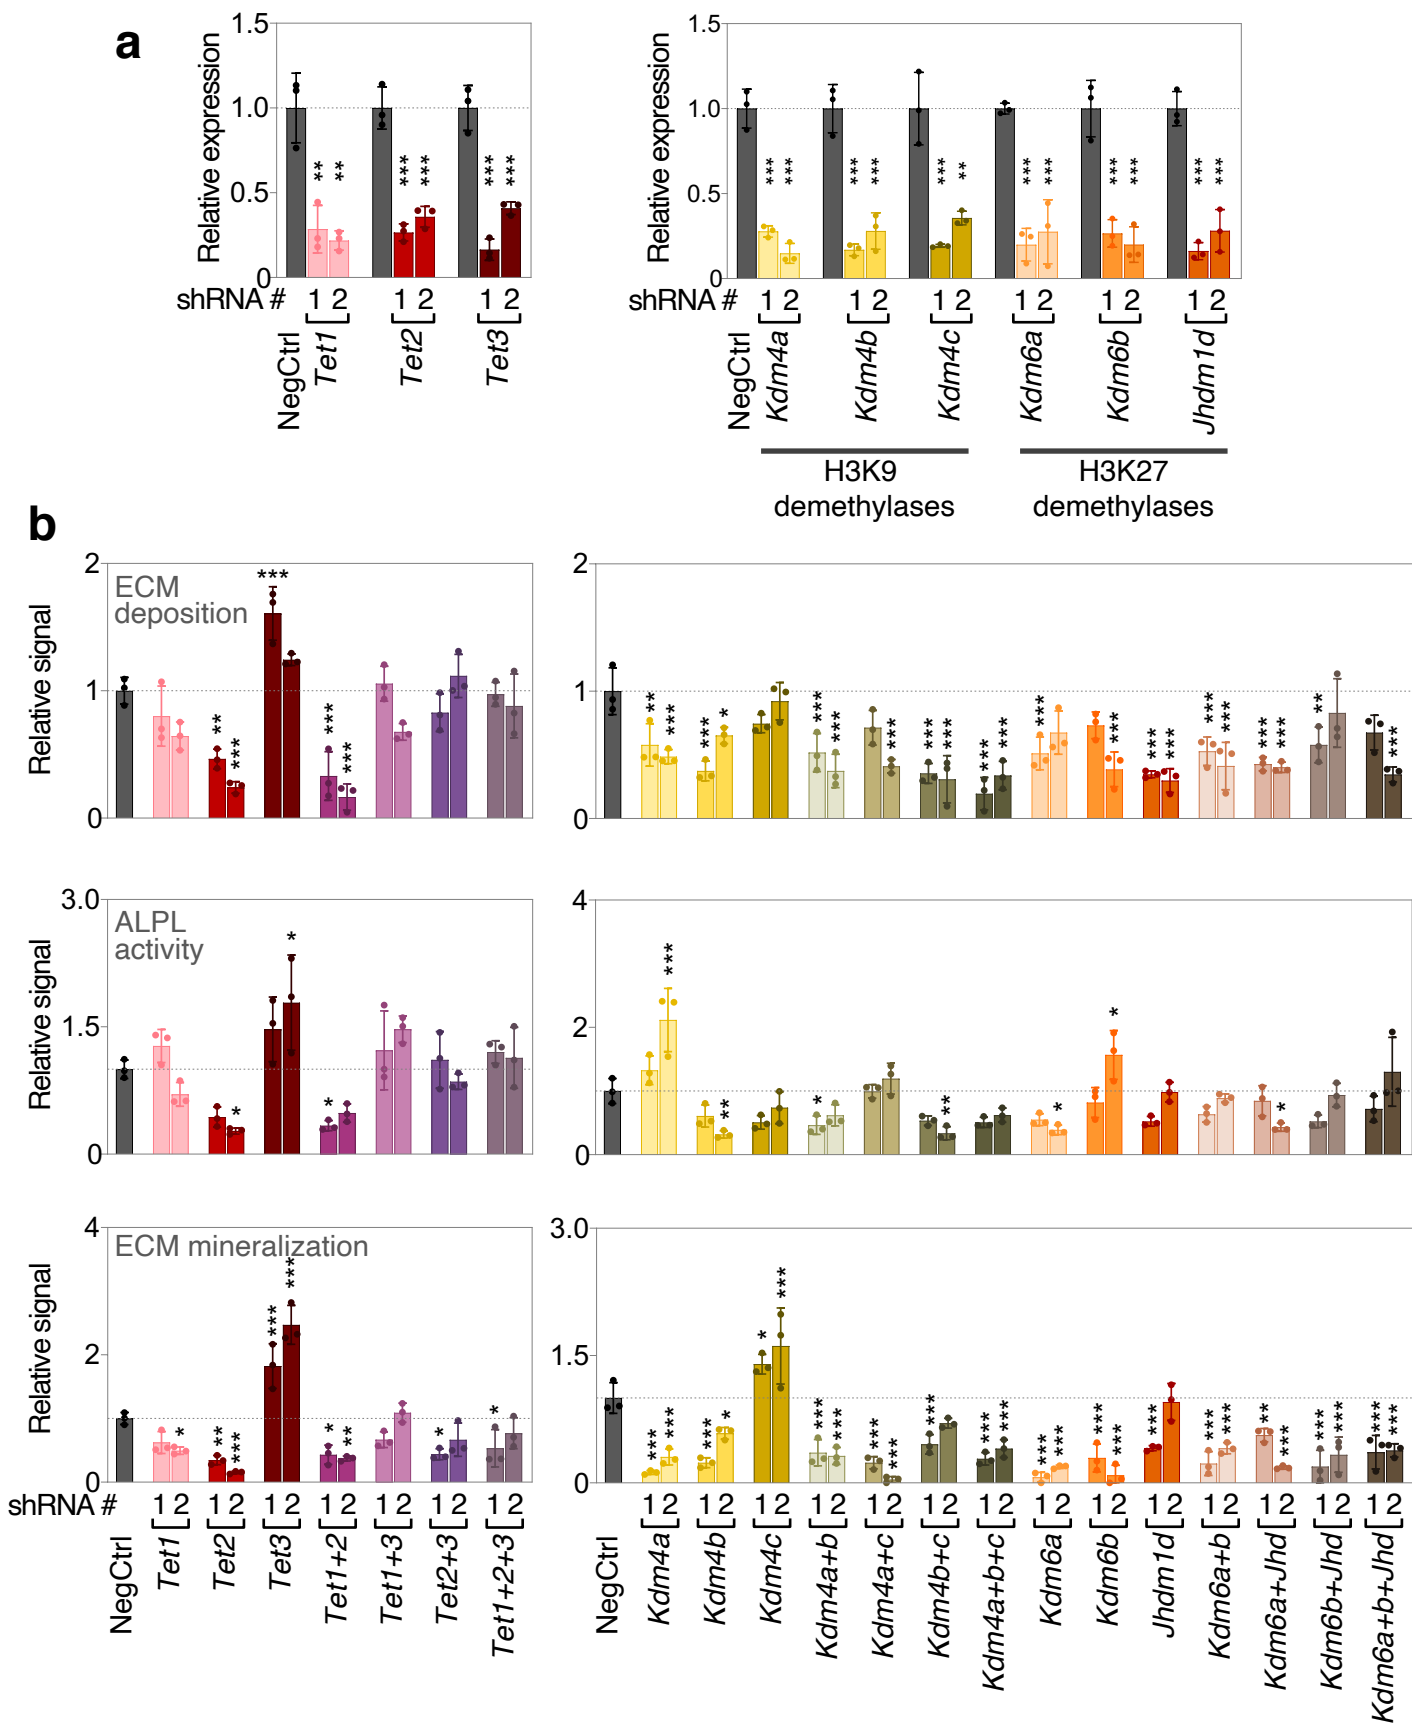

**Supplementary Figure 13: Lack of Vitamin C-dependent epigenetic modulators constrains osteogenic differentiation to varying severities in mBMSCs.** **a** Knockdown efficiencies for DNA demethylases and H3K9me3 and H3K27me3 demethylases by shRNAs at day 3 of differentiation. **b** Effects of knockdowns on ECM deposition at day 10, ALPL activity at day 10 and ECM mineralization at day 35. Graphs represent mean  $\pm$  SD, \* $p < 0.05$ ; \*\* $p < 0.01$ ; \*\*\* $p < 0.001$ . One-way ANOVA testing against NegCtrl using Dunnett's multiple comparison test.  $N=3$  (**a,b**), all from biological independent experiments. Source data as well as exact  $p$ -values for all comparisons are provided in the Source Data File.

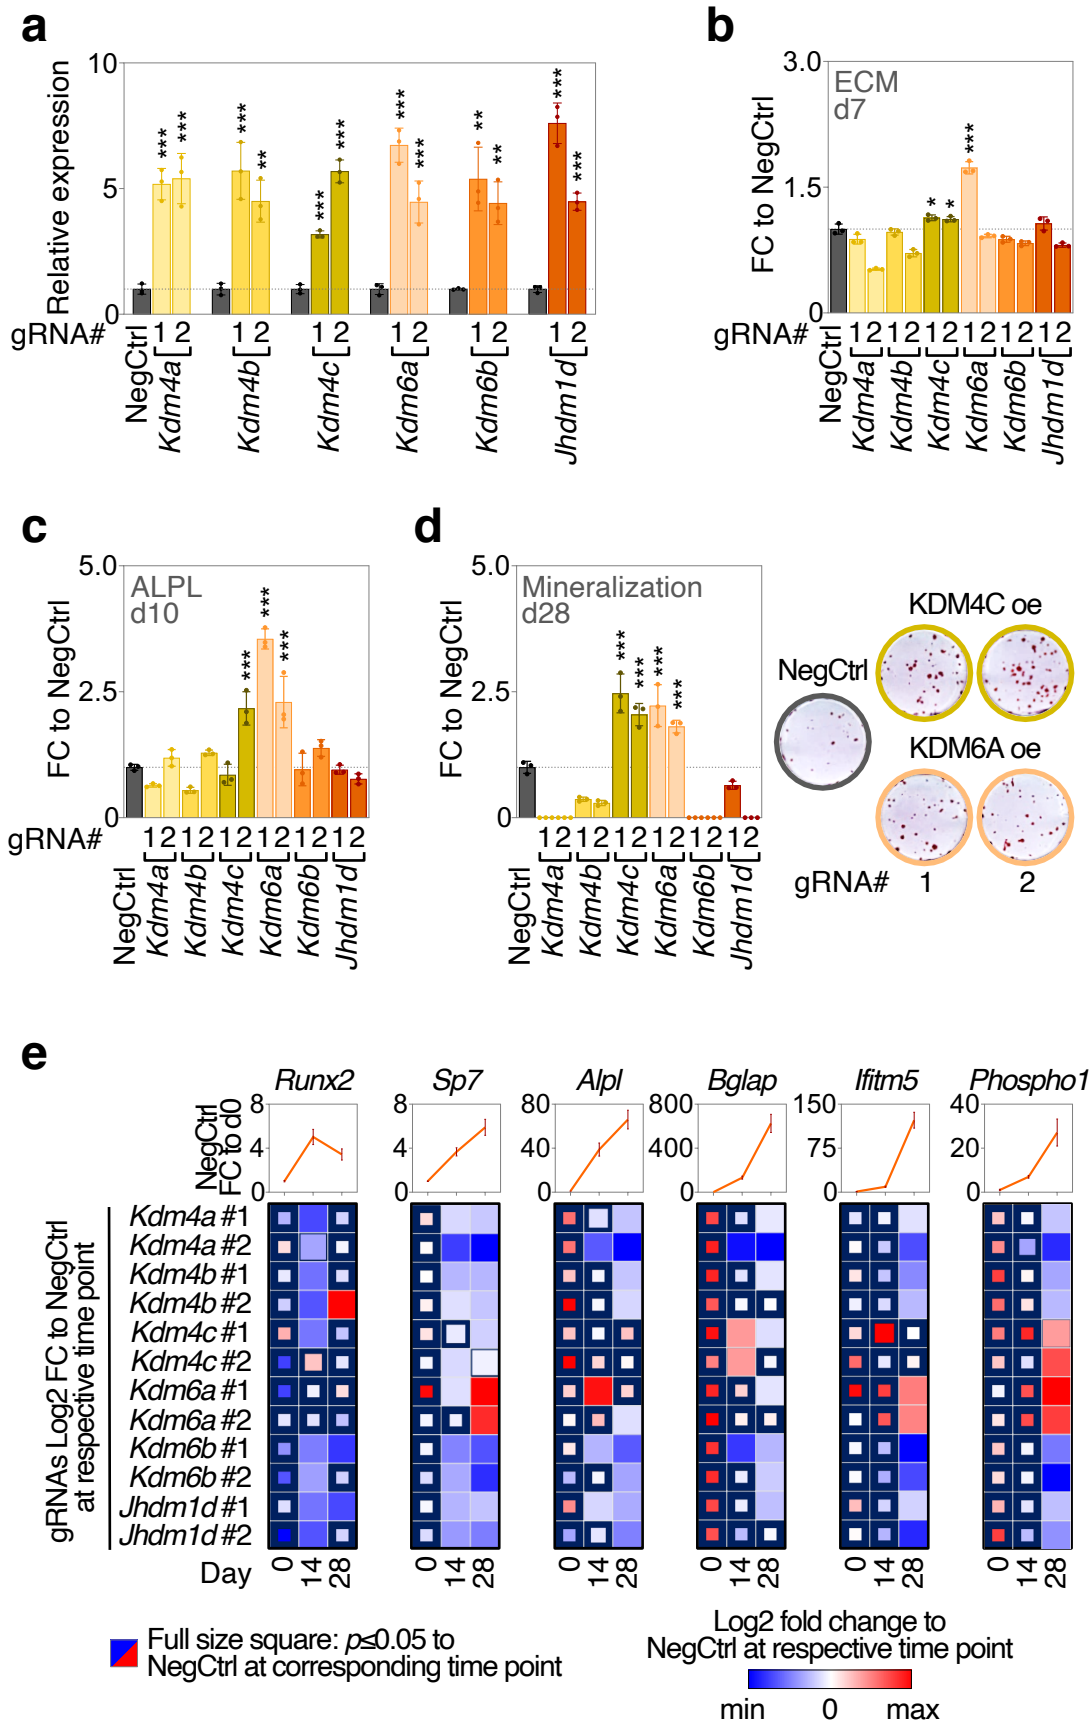

**Supplementary Figure 14: Overexpression of histone demethylases facilitates selected aspects of osteoblastic differentiation.** **a** Efficiencies of gRNAs for the endogenous overexpression of the respective demethylases at the mRNA level in MC3T3-E1 cells. **b-d** Effects of demethylases overexpression on ECM deposition (**b**), ALPL activity (**c**) and ECM mineralization (**d**). **e** mRNA expression of osteogenic markers after demethylases overexpression; line graphs on top represent mRNA expression for NegCtrls, heat maps underneath refer to fold changes to NegCtrls at respective time points. Bar graphs represent mean  $\pm$  SD, \* $p$ <0.05; \*\* $p$ <0.01; \*\*\* $p$ <0.001. One-way ANOVA with Dunnett's multiple comparison test to NegCtrl (**a-d**); two-way ANOVA with Dunnett's multiple comparison test to NegCtrl of the respective gene at corresponding time point (**e**).  $N=3$  (**a-d**), all from biological independent experiments. FC, fold change. Source data as well as exact  $p$ -values for all comparisons in (**a-d**) are provided in the Source Data File.

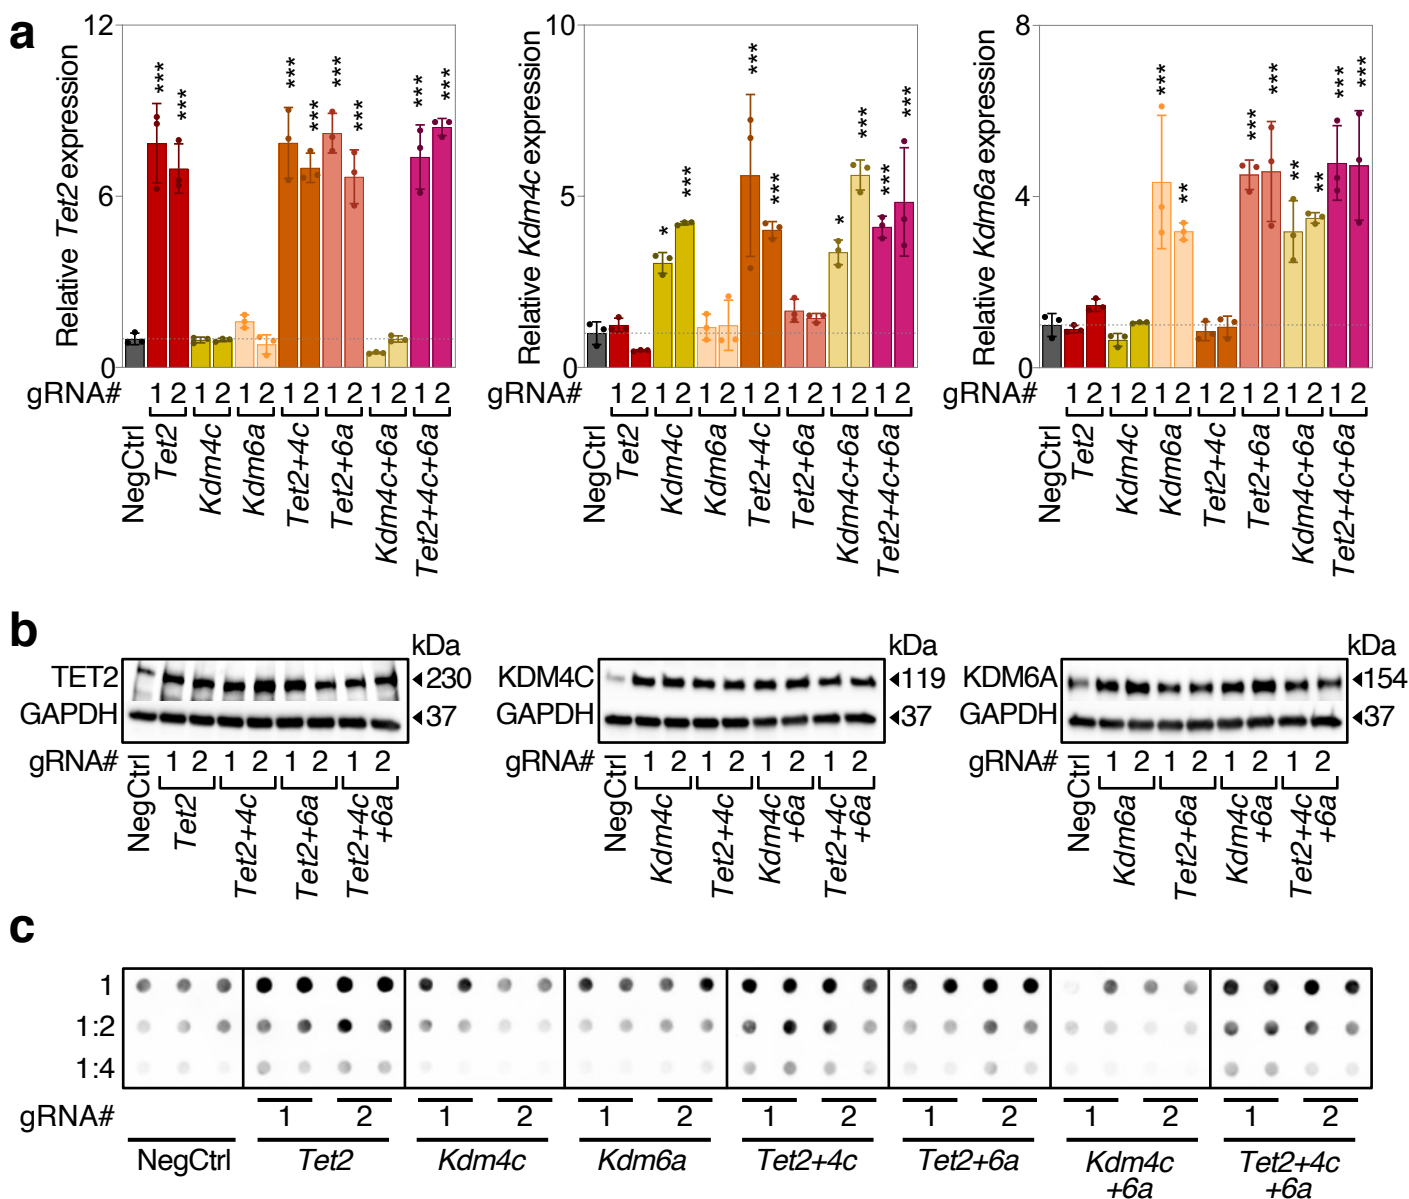

**Supplementary Figure 15: Combined overexpression of DNA and histone demethylases in MC3T3-E1 osteoblasts by CRISPR/dCas9-activation.** **a** Overexpression as measured by relative mRNA levels at day 14 of osteoblastic differentiation. **b** TET2, KDM4C and KDM6A protein expression levels at day 14 of osteogenic differentiation as measured by western blot analysis. **c** 5hmC dot blot at day 14 of osteoblastic differentiation. Bar graphs represent mean  $\pm$  SD, \* $p < 0.05$ ; \*\* $p < 0.01$ ; \*\*\* $p < 0.001$ .  $N = 3$ , all from biological independent experiments and one-way ANOVA with Dunnett's multiple comparison test to NegCtrl (**a**). Source data as well as exact  $p$ -values for all comparisons in (**a**) are provided in the Source Data File.

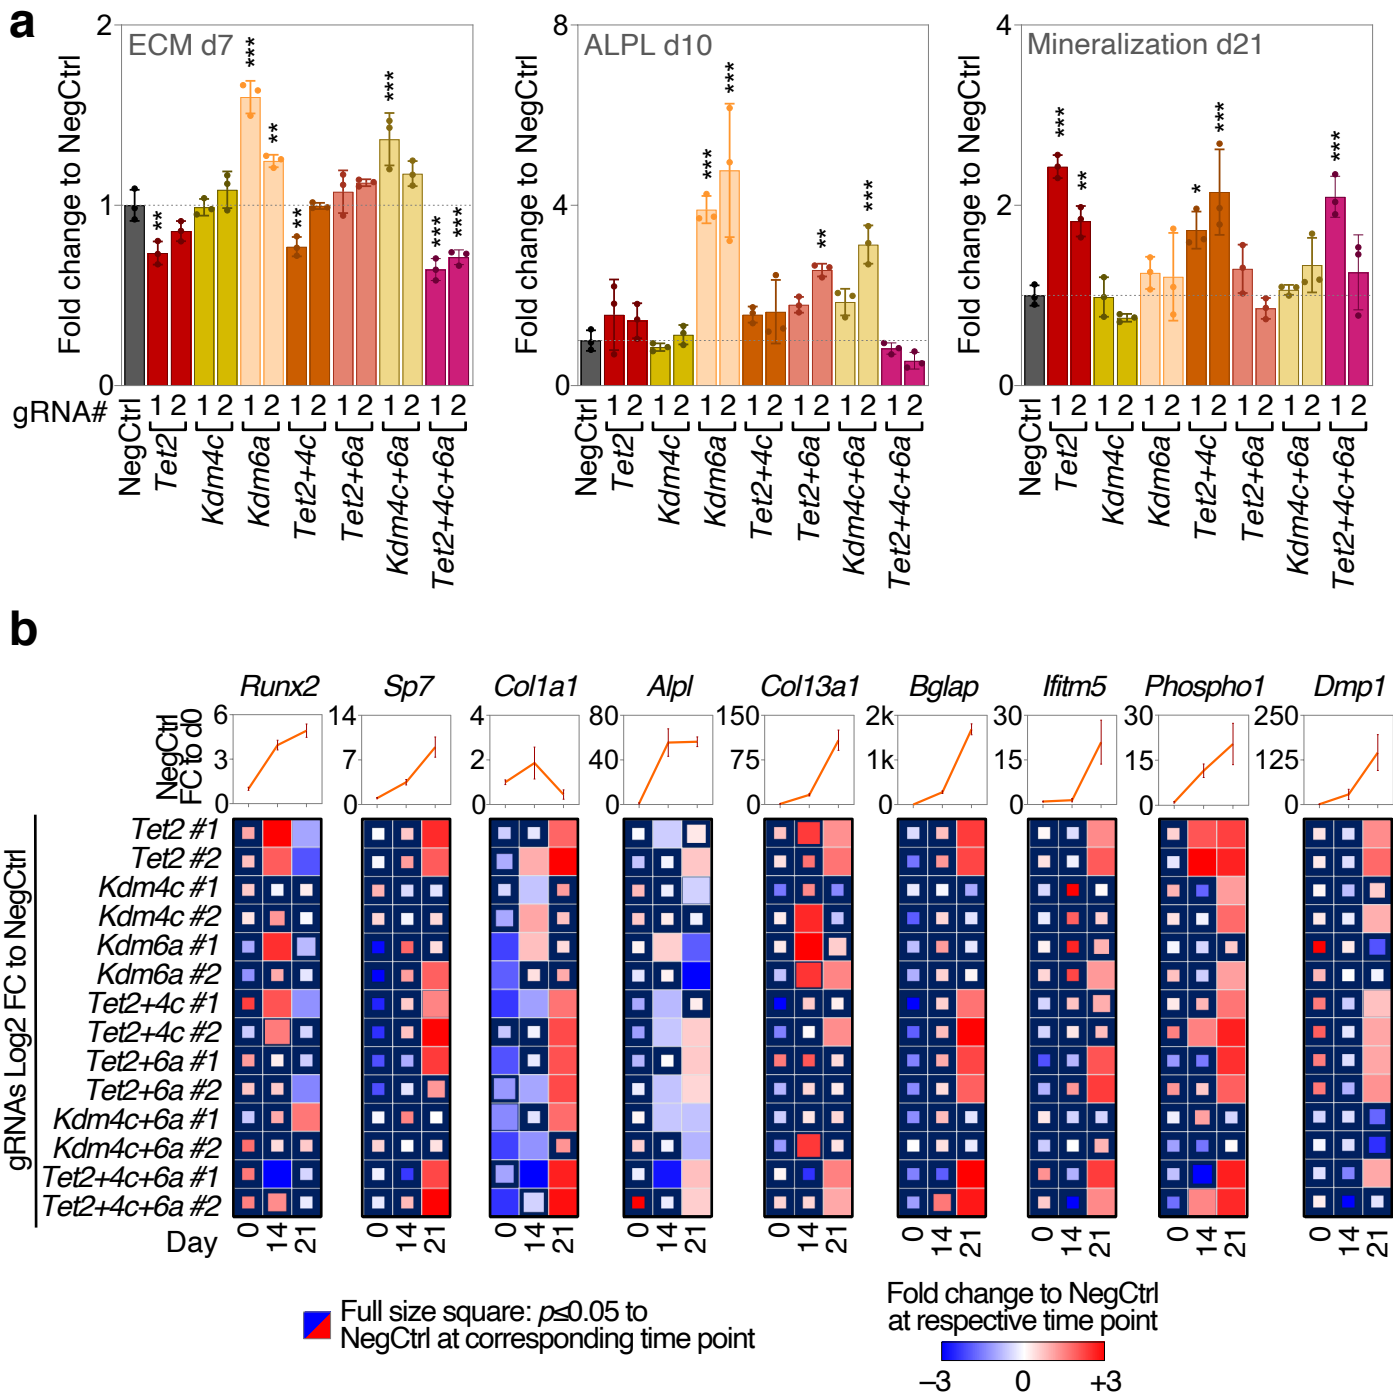

**Supplementary Figure 16: Effects of combined TET2, KDM4C and KDM6A overexpression in differentiating MC3T3-E1 osteoblasts.** **a** Relative ECM deposition, ALPL activity and ECM mineralization. **b** mRNA expression of osteogenic markers after overexpression of *Tet2*, *Kdm4c*, *Kdm6a* or combinations of these during osteogenic differentiation; line graphs on top represent mRNA expression for NegCtrls, heat maps underneath refer to fold changes (FC) to NegCtrls at respective time points. Bar graphs represent mean  $\pm$  SD, \* $p < 0.05$ ; \*\* $p < 0.01$ ; \*\*\* $p < 0.001$ .  $N = 3$ , all from biological independent experiments and one-way ANOVA with Dunnett's multiple comparison test to NegCtrl (**a**), two-way ANOVA with Dunnett's multiple comparison test to NegCtrl at corresponding time point (**b**). Source data as well as exact  $p$ -values for all comparisons in (**a**) are provided in the Source Data File.

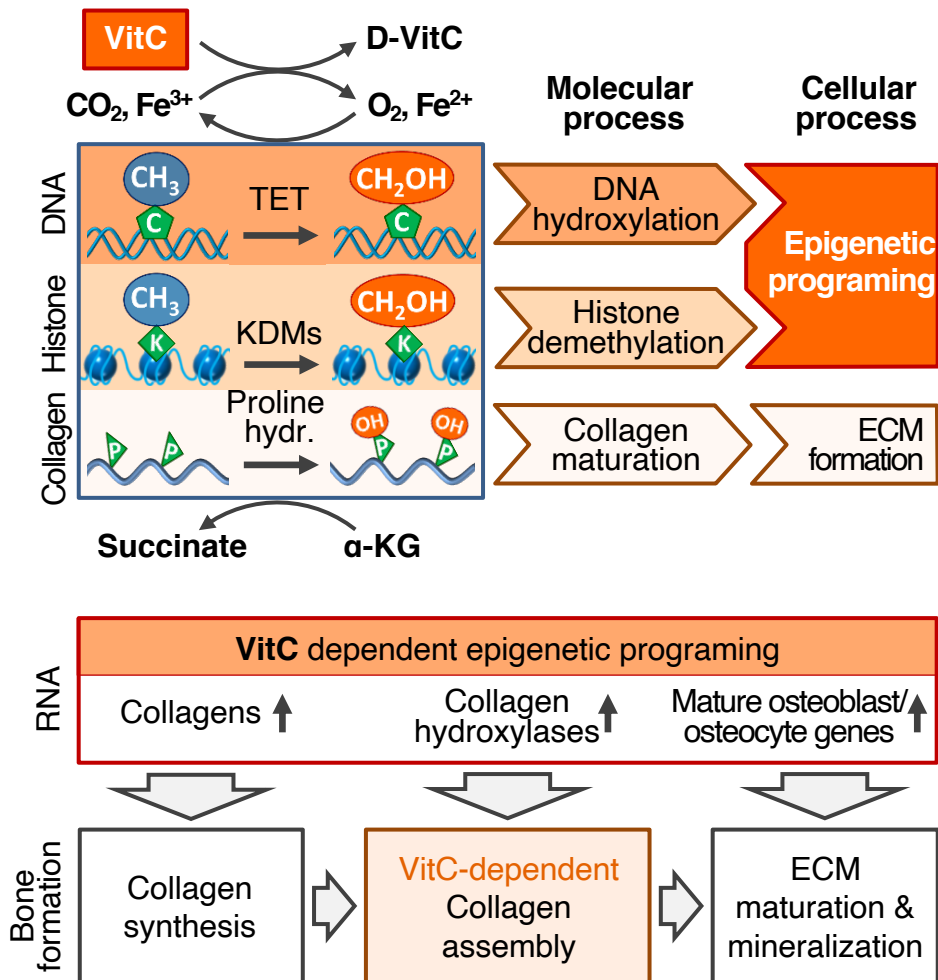

**Supplementary Figure 17: Vitamin C orchestrates osteogenesis by enhancing the activity of DNA, histone and collagen hydroxylases.** Vitamin C acts as co-factor for numerous hydroxylases with varying substrate specificities. During osteogenesis, Vitamin C epigenetically activates and sustains the expression of osteogenic genes, especially via hydroxylation of cytosines on DNA. These genes functionally address all osteoblastic features and functions and include osteogenic transcription factors, collagens, collagen hydroxylases and genes related to ECM mineralization. Source data are provided as a Source Data file.

| Gene                | Forward                  | Reverse                   |
|---------------------|--------------------------|---------------------------|
| <b>Primers</b>      |                          |                           |
| <i>Alpl</i>         | CCAGAAAGACACCTTGACTGTGG  | TCTTGTCCGTGTGCGTACCAT     |
| <i>Bglap2</i>       | GCAATAAGGTAGTGAACAGACTCC | CCATAGATGCGTTTGTAGGCGG    |
| <i>Bmp2</i>         | GGGACCCGCTGTCTTCTAGT     | TCAACTCAAATTCGCTGAGGAC    |
| <i>Cebpa</i>        | GCAAAGCCAAAGGTCGGTGGGA   | CCTTCTGTTGCGTCTCCACGTT    |
| <i>Cebpb</i>        | CAACCTGGAGACGCAGCACAAG   | GCTTGAACAAGTCCGCGAGGGT    |
| <i>Col11a2</i>      | GAAGGGTGTCTGTGGGAAA      | GAGGGCTGGGTATCCTAGAG      |
| <i>Col1a1</i>       | CCTCAGGGTATTGCTGGACAAC   | CAGAAGGACCTTGTGGCAGG      |
| <i>Dlx3</i>         | CACTGACCTGGGCTATTACAGC   | GAGATTGAACTGGTGGTGTAG     |
| <i>Dlx5</i>         | AGGCTTATGCCGACTACGGCTA   | CTCTGGCTCCGCCACTTCTTTC    |
| <i>Dmp1</i>         | AAAGACCACGACAGTGAGGAT    | CATCATCGAACTCAGAACCCTC    |
| <i>Enpp1</i>        | CTGGTTTTGTGAGTGTGTGCT    | CTCACCAGCCTGAATTTGTT      |
| <i>Grem1</i>        | CTGGGGACCCTACTGCCAA      | TTTGACCAATCTCGCTTCAG      |
| <i>Hprt1</i>        | CTGGTGAAGGAGCCTCTCGAAG   | CCAGTTTCACTAATGACACAAC    |
| <i>Ibsp</i>         | CAGGGAGGCGACTCTTTC       | AGTGTGAAAGTGTGGCCTT       |
| <i>Ifitm5</i>       | ACCACGAGATCACATGCTCTG    | GGATGTTGTAGCACTTGGCTT     |
| <i>Igfbp5</i>       | CCCTGCGACGAGAAAGCTC      | GCTCTTTTCTGTTGAGGCAAA     |
| <i>Jhdm1d</i>       | GGCAAACAGTTAAATCTCAGGG   | AGGTTAGAGGAGTTCGGACAT     |
| <i>Kdm4a</i>        | CTATGGGCTCTGTGAGGCTG     | GGATAAAAACCTGGAGCCTAAAG   |
| <i>Kdm4b</i>        | TGACTCACAGGGAACAACCC     | CTCCTGCTTGACCACAGACA      |
| <i>Kdm4c</i>        | CGAACAGCTGTACCCAGT       | GATGGCCACAGATGTTTCTGC     |
| <i>Kdm6a</i>        | TCAACATGCTCCTCCATTACCA   | GCCAGCAGCCTTACGAGATA      |
| <i>Kdm6b</i>        | GTCAGCCTCATAGCAGGACC     | CGCCTCAGTAACAGCCAGAT      |
| <i>Lox</i>          | CTTCTGCTGCGTGACAACC      | GAGAAACCAGCTTGGAAACCAG    |
| <i>Lox4</i>         | GCCAACGACGACAGCAGAG      | CCAGGTCAAGGCTGACTCAAA     |
| <i>Lum</i>          | CTCTTGCTTGGCAATTAGTCG    | GGGGCAGTTTCACTTCTGGTG     |
| <i>Mef2c</i>        | GTGGTTTTCCGTAGCAACTCTAC  | GGCAGTGTGAAGCCAGACAGA     |
| <i>Mepe</i>         | AATGCCACAGACTAAGCCC      | CTGTCTTCACTCGGCTTGGT      |
| <i>Mmp13</i>        | CTTCTTCTTGTGAGCTGGACTC   | CTGTGGAGTCACTGTAGACT      |
| <i>Msx2</i>         | AAGACGGAGCACCGTGGATACA   | CGGTTGGTCTTGTGTTCTCAG     |
| <i>Nrip2</i>        | CAGCAGCCCAACTCAAA        | GGCGTCTTGGATCACACTGT      |
| <i>P3h1</i>         | AACAGAAGTCGGAACGCGAAA    | TCCACGAGGCTCGATCTC        |
| <i>P3h2</i>         | TGTGGCCGAATGATCAGCTT     | GTATCCGCTCCAGTCTCGG       |
| <i>P3h3</i>         | TGCTCTGAGTGTCTGCTCT      | CCGGTCTCTGAAGCTAGTG       |
| <i>P4ha1</i>        | TGGGTTGTTTTAATGATGGCGA   | GCCGGTCAACTTCTCTGCC       |
| <i>P4ha2</i>        | CAGGTACTATGATGTGATGTCCC  | AAAGGTCGCTTGGAGAAGCT      |
| <i>P4ha3</i>        | ACATGCTCAACGTGAAGGG      | TGCCAACTTGGAAAGCAGTAT     |
| <i>Phex</i>         | GAAAGGGGACCAACCGAGG      | AACTTAGGAGACCTTGACTCACT   |
| <i>Phospho1</i>     | ATGAGCGGGTGTTCACAG       | TGCCGTCCCTAGATAGGCATC     |
| <i>Plin1</i>        | CAAGCACCTCTGACAAGGTTT    | GTTGGCGGATATTCTGCTG       |
| <i>Plod1</i>        | GAAGGATGACGCCAAGCTAGA    | TGAAGAACTGAGCTGAACGCT     |
| <i>Plod2</i>        | GAGAGGGGCTGATGGAATGAA    | ACTCGGTAACAAGATGACCAGA    |
| <i>Plod3</i>        | ATGTGGCTCGAACAGTTGGTG    | TTGCCAGAATCACGTCGTAGC     |
| <i>Pparg</i>        | TCGCTGATGCACTGCCTATG     | GAGAGGTCACAGAGCTGATT      |
| <i>Runx2</i>        | CCTGAACCTCTGCACCAAGTCTT  | TCATCTGGCTCAGATGAGGGG     |
| <i>Slc2a1</i>       | CAGTTCGGCTATAACTGGTG     | GCCCCGACAGAGAAGATG        |
| <i>Slc2a3</i>       | ATGGGGACAACGAAGGTGAC     | CAGGTGCATTGATGACTCCAG     |
| <i>Slc36a2</i>      | GCATAACCGGGTTCAGACAT     | ATGAGGCCCAATCCAGCAAG      |
| <i>Smpd3</i>        | ACACGACCCCTTCTTAATA      | GGCGCTTCTCATTAGTGGTG      |
| <i>Sost</i>         | AGCCTTCAGGAATGATGCCAC    | CTTTGGCTCATAGGGATGGT      |
| <i>Sp7</i>          | GGCTTTTTCTCGGGCAAGGTT    | CGCTGATGTTTGTCTAAGTGGT    |
| <i>Sparc</i>        | GTGGAATGAGGAATTTGAGGA    | CTCACACACCTTGCCATGTTT     |
| <i>Spp1</i>         | GCTTGGCTTATGGACTGAGGTC   | CCTTAGACTCACCGCTTCTCATG   |
| <i>Tet1</i>         | ATTTCCGCATCTGGGAACCTG    | GGAAAGTTGATCTTTGGGGCAAT   |
| <i>Tet2</i>         | CCCCTTAGCAGAGACCTCA      | CTGACTGTGCGTTTTATCCCT     |
| <i>Tet3</i>         | CGCTGCTCGTCTGGAAGATG     | GGCCCCGTAAGATGACACA       |
| <i>Wnt11</i>        | GCTGGCACTGTCCAAGACTC     | CTCCCGTGTACCTCTCTCCA      |
| <i>Wnt5b</i>        | AGATAGGTAGCCGAGAGACTGC   | GGTAGCCGTACTCCAGGTTG      |
| <i>Wnt7b</i>        | TTTGGCTCTCTACTCGTGAAG    | CCCCGATCACAATGATGGCA      |
| <i>Wnt9a</i>        | GGCCCAAGCACACTACAAG      | AGAAGAGATGGCTAGAGGAAA     |
| <i>Zfp521</i>       | GCGAAACCGAGATCCCTCAA     | GTGCTCAGTGACTCAAACAC      |
| <b>gRNAs</b>        |                          |                           |
| <i>Kdm4a</i> gRNA1  | ACCGAACACTCACTACCCGACT   | AAACAGTCGGTGTAGTGTGTTT    |
| <i>Kdm4a</i> gRNA2  | ACCGCAGTGGCCCCAGTCCCCGG  | AAACCCGGGGGACTGGGGCCACTGC |
| <i>Kdm4b</i> gRNA1  | ACCGTGGGTGCCGGCACGTCCCTC | AAACGAGGACGTGCCGGCACCCAC  |
| <i>Kdm4b</i> gRNA2  | ACCGGCCGCTCGGTGTTGATGAG  | AAACCTCATCAACACCGAGCGGCC  |
| <i>Kdm4c</i> gRNA1  | ACCGGCTGGGCCGGGCGCTCTCT  | AAACAGAGAGCGCCCGGCCAGCC   |
| <i>Kdm4c</i> gRNA2  | ACCGGGTCTCTAAACTGCTTAA   | AAACTTAAGCAGTTTAGAGACCCC  |
| <i>Kdm6a</i> gRNA1  | ACCGGGCAGTCTGTCCGGAGTA   | AAACTACTCCGGACAGAGCTGCC   |
| <i>Kdm6a</i> gRNA2  | ACCGGATCTGTGGCGGCTCGGT   | AAACACCGAGCCCGCCACAGATCC  |
| <i>Kdm6b</i> gRNA1  | ACCGCTCTAAGGGAGATGATCG   | AAACCGATCATCTCCCTTAGGAGC  |
| <i>Kdm6b</i> gRNA2  | ACCGCGAGTGGCGCTGCTCTAA   | AAACTTAGGAGCAGCGGCACTCGC  |
| <i>Jhdm1d</i> gRNA1 | ACCGCGGAGACCGAGAACGTGCG  | AAACCGCACGTTCTCGCTCCGCG   |
| <i>Jhdm1d</i> gRNA2 | ACCGGCCGAGCGAGCAAGGTCC   | AAACCGACCTTGTCTGCTCGGCC   |
| <i>Tet2</i> gRNA1   | ACCGGACTGTACTGGCATGCGAG  | AAACCTCGCATGCCAGTCACTCC   |
| <i>Tet2</i> gRNA2   | ACCGCGCACCCGGGCTCAGGAA   | AAACTTCTGAGCCCCGGTGGCCG   |

**Supplementary Table 1: Sequences for used primers and gRNAs.**

**Mouse**

| Tissue                   | GEO annotation | SRR code                                                               |
|--------------------------|----------------|------------------------------------------------------------------------|
| Bone                     | This study     | This study                                                             |
| Bone                     | This study     | This study                                                             |
| Bone                     | This study     | This study                                                             |
| Bone                     | This study     | This study                                                             |
| Bone                     | This study     | This study                                                             |
| Bone                     | This study     | This study                                                             |
| Bone                     | This study     | This study                                                             |
| Immature cartilage       | GSM2977013     | SRR6666076                                                             |
| Immature cartilage       | GSM2977014     | SRR6666077                                                             |
| Immature cartilage       | GSM2977015     | SRR6666078                                                             |
| Mature cartilage         | GSM2977016     | SRR6666079                                                             |
| Mature cartilage         | GSM2977017     | SRR6666080                                                             |
| Mature cartilage         | GSM2977018     | SRR6666081                                                             |
| Cartilage hypertropic    | GSM3154535     | SRR7217931, SRR7217932, SRR7217933, SRR7217934, SRR7217935, SRR7217936 |
| Cartilage hypertropic    | GSM3154536     | SRR7217937, SRR7217938, SRR7217939, SRR7217940, SRR7217941, SRR7217942 |
| Cartilage hypertropic    | GSM3154537     | SRR7217943, SRR7217944, SRR7217945, SRR7217946, SRR7217947, SRR7217948 |
| Cartilage hypertropic    | GSM3154538     | SRR7217949, SRR7217950, SRR7217951, SRR7217952, SRR7217953, SRR7217954 |
| Cartilage hypertropic    | GSM3154539     | SRR7217955, SRR7217956, SRR7217957, SRR7217958, SRR7217959, SRR7217960 |
| Cartilage profil. zone   | GSM3154555     | SRR7218051, SRR7218052, SRR7218053, SRR7218054, SRR7218055, SRR7218056 |
| Cartilage profil. zone   | GSM3154556     | SRR7218057, SRR7218058, SRR7218059, SRR7218060, SRR7218061, SRR7218062 |
| Cartilage profil. zone   | GSM3154557     | SRR7218063, SRR7218064, SRR7218065, SRR7218066, SRR7218067, SRR7218068 |
| Cartilage profil. zone   | GSM3154558     | SRR7218069, SRR7218070, SRR7218071, SRR7218072, SRR7218073, SRR7218074 |
| Cartilage profil. zone   | GSM3154559     | SRR7218075, SRR7218076, SRR7218077, SRR7218078, SRR7218079, SRR7218080 |
| Fat                      | GSM3093058     | SRR6984624                                                             |
| Fat                      | GSM3093059     | SRR6984625                                                             |
| Fat                      | GSM3093060     | SRR6984626                                                             |
| Fat                      | GSM3093046     | SRR6984612                                                             |
| Fat                      | GSM3093047     | SRR6984613                                                             |
| Fat                      | GSM3093048     | SRR6984614                                                             |
| Heart                    | GSM2595506     | SRR5494677                                                             |
| Heart                    | GSM2595507     | SRR5494678                                                             |
| Heart                    | GSM2595508     | SRR5494679                                                             |
| Heart                    | GSM2595509     | SRR5494680                                                             |
| Liver                    | GSM2428116     | SRR5106551                                                             |
| Liver                    | GSM2428117     | SRR5106553                                                             |
| Liver                    | GSM2428118     | SRR5106555                                                             |
| Liver                    | GSM2452248     | SRR5164499                                                             |
| Liver                    | GSM2452250     | SRR5164501                                                             |
| Muscle                   | GSM2208774     | SRR3705519                                                             |
| Muscle                   | GSM2208775     | SRR3705520                                                             |
| Muscle                   | GSM2208779     | SRR3705524                                                             |
| Muscle                   | GSM2208782     | SRR3705527                                                             |
| Muscle                   | GSM2208783     | SRR3705528                                                             |
| Spinal cord              | GSM2836602     | SRR6237215                                                             |
| Spinal cord              | GSM2836603     | SRR6237216                                                             |
| Spinal cord              | GSM2836604     | SRR6237217                                                             |
| Spinal cord              | GSM2836605     | SRR6237218                                                             |
| Spinal cord              | GSM2836606     | SRR6237219                                                             |
| Lung                     | GSM2927614     | SRR6456618                                                             |
| Lung                     | GSM2927615     | SRR6456619                                                             |
| Lung                     | GSM2927600     | SRR6456604                                                             |
| Lung                     | GSM2927601     | SRR6456605                                                             |
| Lung                     | GSM2927602     | SRR6456606                                                             |
| Brain                    | GSM3169030     | SRR7244449                                                             |
| Brain                    | GSM3169031     | SRR7244450                                                             |
| Brain                    | GSM3169032     | SRR7244451                                                             |
| Whole blood              | GSM3244452     | SRR7472435                                                             |
| Whole blood              | GSM3244453     | SRR7472436                                                             |
| Whole blood              | GSM3244454     | SRR7472437                                                             |
| Whole blood              | GSM3244455     | SRR7472438                                                             |
| BMSCs                    | GSM3155166     | SRR7219450                                                             |
| BMSCs                    | GSM3155167     | SRR7219451                                                             |
| BMSCs                    | GSM3242777     | SRR7465585                                                             |
| BMSCs                    | GSM3242778     | SRR7465586                                                             |
| BMSCs                    | GSM3242779     | SRR7465587                                                             |
| BMSCs                    | GSM2793815     | SRR6076938                                                             |
| BMSCs                    | GSM4238081     | SRR10801329                                                            |
| BMSCs                    | GSM4238082     | SRR10801330                                                            |
| BMSCs                    | GSM4238083     | SRR10801331                                                            |
| ESCs                     | GSM4104491     | SRR10212910                                                            |
| ESCs                     | GSM4104492     | SRR10212911                                                            |
| ESCs                     | GSM5048817     | SRR13572970                                                            |
| ESCs                     | GSM5048818     | SRR13572971                                                            |
| ESCs                     | GSM5048819     | SRR13572972                                                            |
| ESCs                     | GSM4850905     | SRR12884018                                                            |
| ESCs                     | GSM4850906     | SRR12884019                                                            |
| ESCs                     | GSM4850907     | SRR12884020                                                            |
| ESCs                     | GSM4850908     | SRR12884021                                                            |
| BMSCs (H3K27ac ChIP-Seq) | GSM1973729     | SRR3020952                                                             |
| BMSCs (H3K27ac ChIP-Seq) | GSM1973730     | SRR3020953                                                             |

**Human**

| Tissue             | GEO annotation | SRR code                                       |
|--------------------|----------------|------------------------------------------------|
| Bone               | GSM11872881    | SRR2305536                                     |
| Bone               | GSM11872882    | SRR2305537                                     |
| Bone               | GSM11872883    | SRR2305538                                     |
| Bone               | GSM11872884    | SRR2305539                                     |
| Bone               | GSM11872885    | SRR2305540                                     |
| Bone               | GSM2871626     | SRR6337317                                     |
| Bone               | GSM2871627     | SRR6337318                                     |
| Bone               | GSM2871628     | SRR6337319                                     |
| Adult cartilage    | GSM2871645     | SRR6337336                                     |
| Adult cartilage    | GSM2871646     | SRR6337337                                     |
| Adult cartilage    | GSM2871647     | SRR6337338                                     |
| Juvenile cartilage | GSM2871642     | SRR6337333                                     |
| Juvenile cartilage | GSM2871643     | SRR6337334                                     |
| Juvenile cartilage | GSM2871644     | SRR6337335                                     |
| Tendon             | GSM2871632     | SRR6337323                                     |
| Tendon             | GSM2871633     | SRR6337324                                     |
| Tendon             | GSM2871634     | SRR6337325                                     |
| White fat          | GSM3119101     | SRR7073362                                     |
| White fat          | GSM3119103     | SRR7073364                                     |
| White fat          | GSM3119107     | SRR7073368                                     |
| White fat          | GSM3119109     | SRR7073370                                     |
| White fat          | GSM3119112     | SRR7073373                                     |
| Ligament           | GSM2871629     | SRR6337320                                     |
| Ligament           | GSM2871630     | SRR6337321                                     |
| Ligament           | GSM2871631     | SRR6337322                                     |
| Brain              | GSM11414931    | SRR1424658                                     |
| Brain              | GSM11414947    | SRR1424674                                     |
| Brain              | GSM11414962    | SRR1424689                                     |
| Brain              | GSM11414962    | SRR1424679                                     |
| Liver              | GSM2809210     | SRR6163894                                     |
| Liver              | GSM2809211     | SRR6163895                                     |
| Liver              | GSM2809213     | SRR6163897                                     |
| Liver              | GSM2809214     | SRR6163898                                     |
| Muscle             | GSM2835494     | SRR6231603, SRR6231604, SRR6231605, SRR6231606 |
| Muscle             | GSM2835495     | SRR6231607, SRR6231608, SRR6231609, SRR6231610 |
| Muscle             | GSM2835496     | SRR6231611, SRR6231612, SRR6231613, SRR6231614 |
| Muscle             | GSM2835497     | SRR6231615, SRR6231616, SRR6231617, SRR6231618 |
| Lung               | GSM1194676     | SRR942541                                      |
| Lung               | GSM1194682     | SRR942547                                      |
| Lung               | GSM1194687     | SRR942552                                      |
| Lung               | GSM1194693     | SRR942558                                      |
| Whole blood        | GSM3056569     | SRR6868715                                     |
| Whole blood        | GSM3056570     | SRR6868716                                     |
| Whole blood        | GSM3056571     | SRR6868717                                     |
| Whole blood        | GSM3056572     | SRR6868718                                     |
| Whole blood        | GSM3056573     | SRR6868719                                     |
| Whole blood        | GSM3056574     | SRR6868720                                     |

**Supplementary Table 2: Accession codes for publically available RNA-Seq datasets used in this study.**



We note that  marks picture shown in corresponding figure.

### Uncropped blots: Supplementary Figure 3c

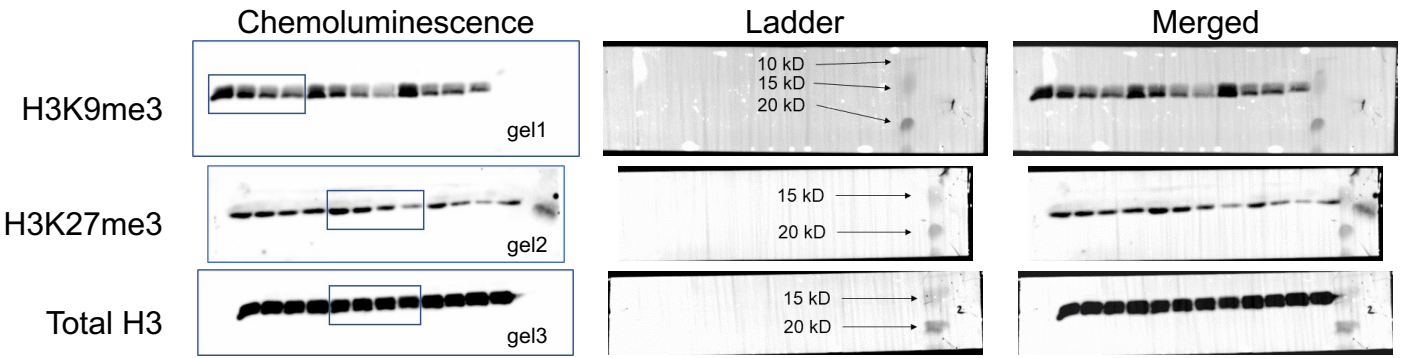

### Uncropped blots: Supplementary Figure 4e

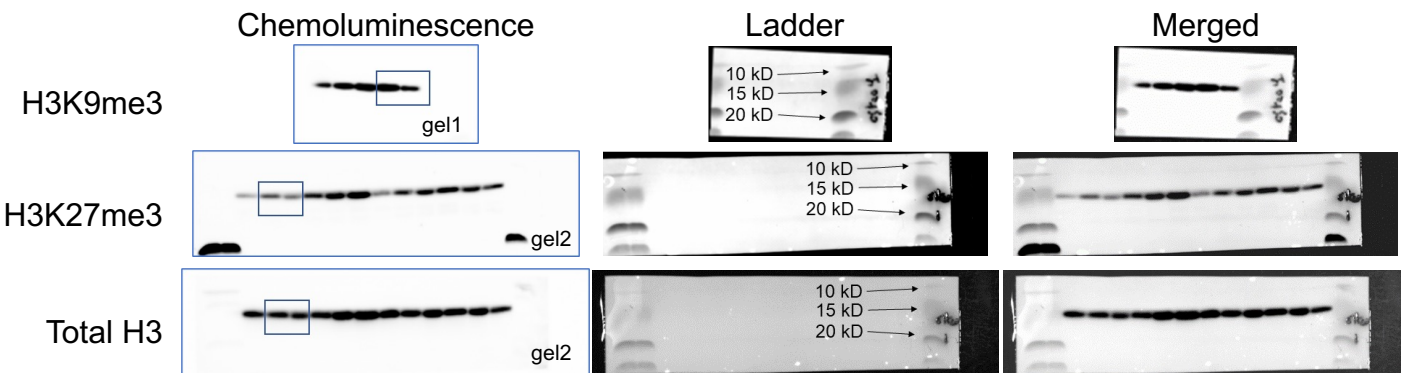

### Uncropped blots: Supplementary Figure 5d

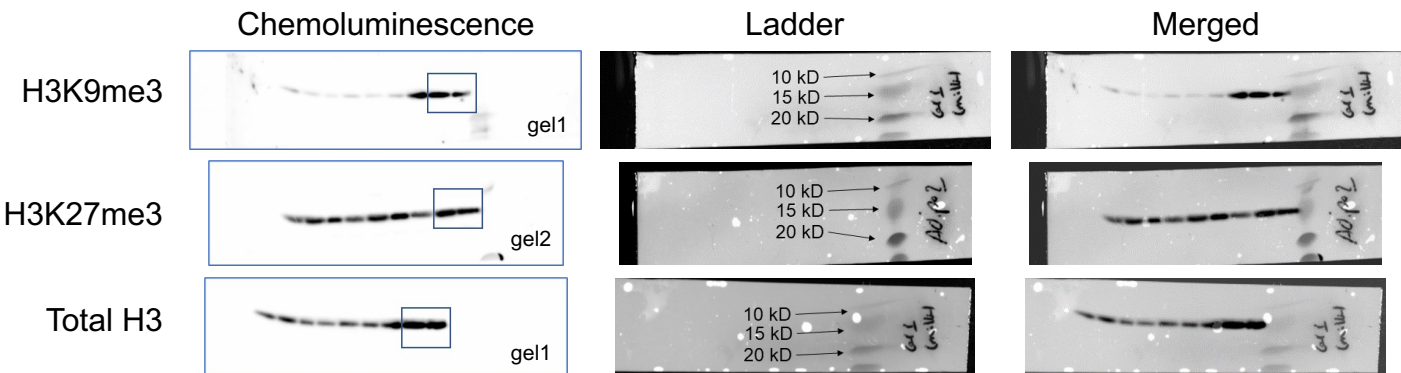

### Uncropped blots: Supplementary Figure 6b

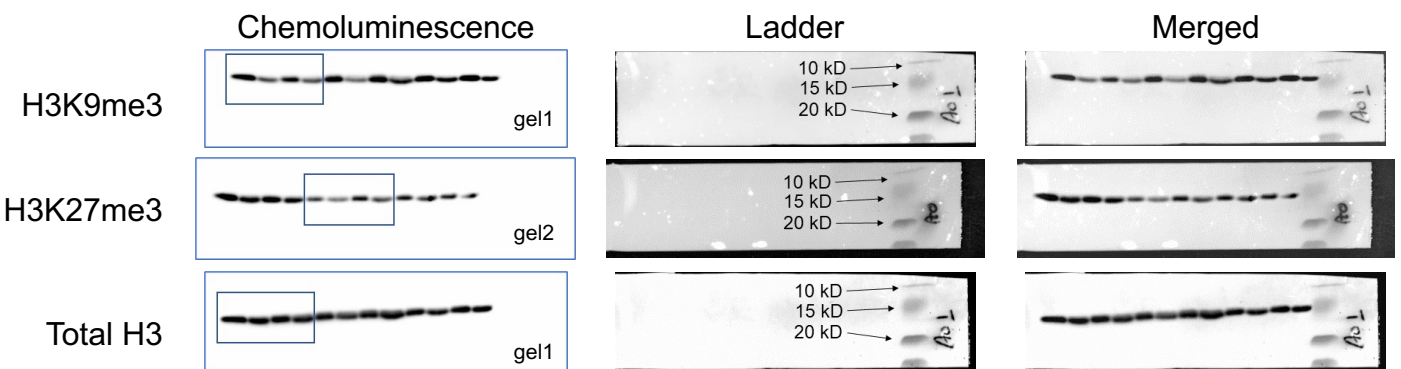

We note that  marks picture shown in corresponding figure.

### Uncropped blots: Supplementary Figure 8c

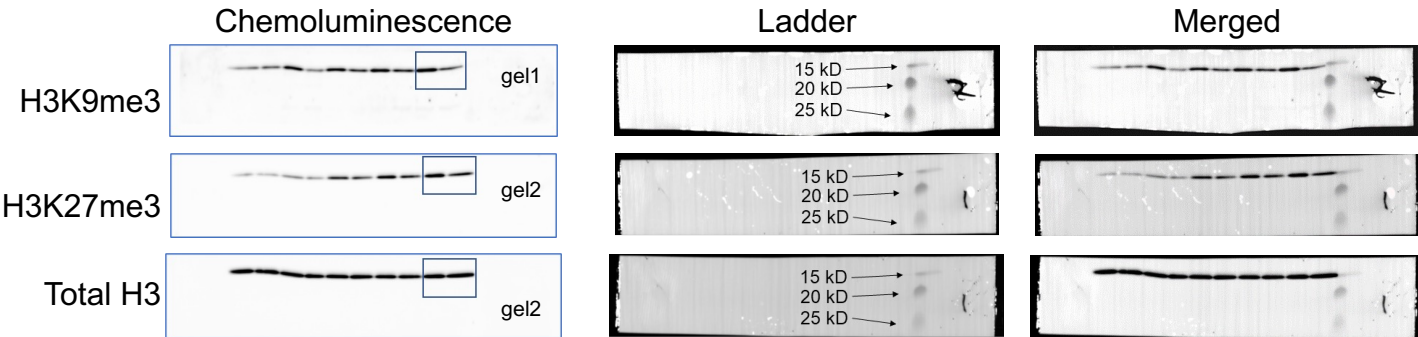

### Uncropped blots: Supplementary Figure 15b

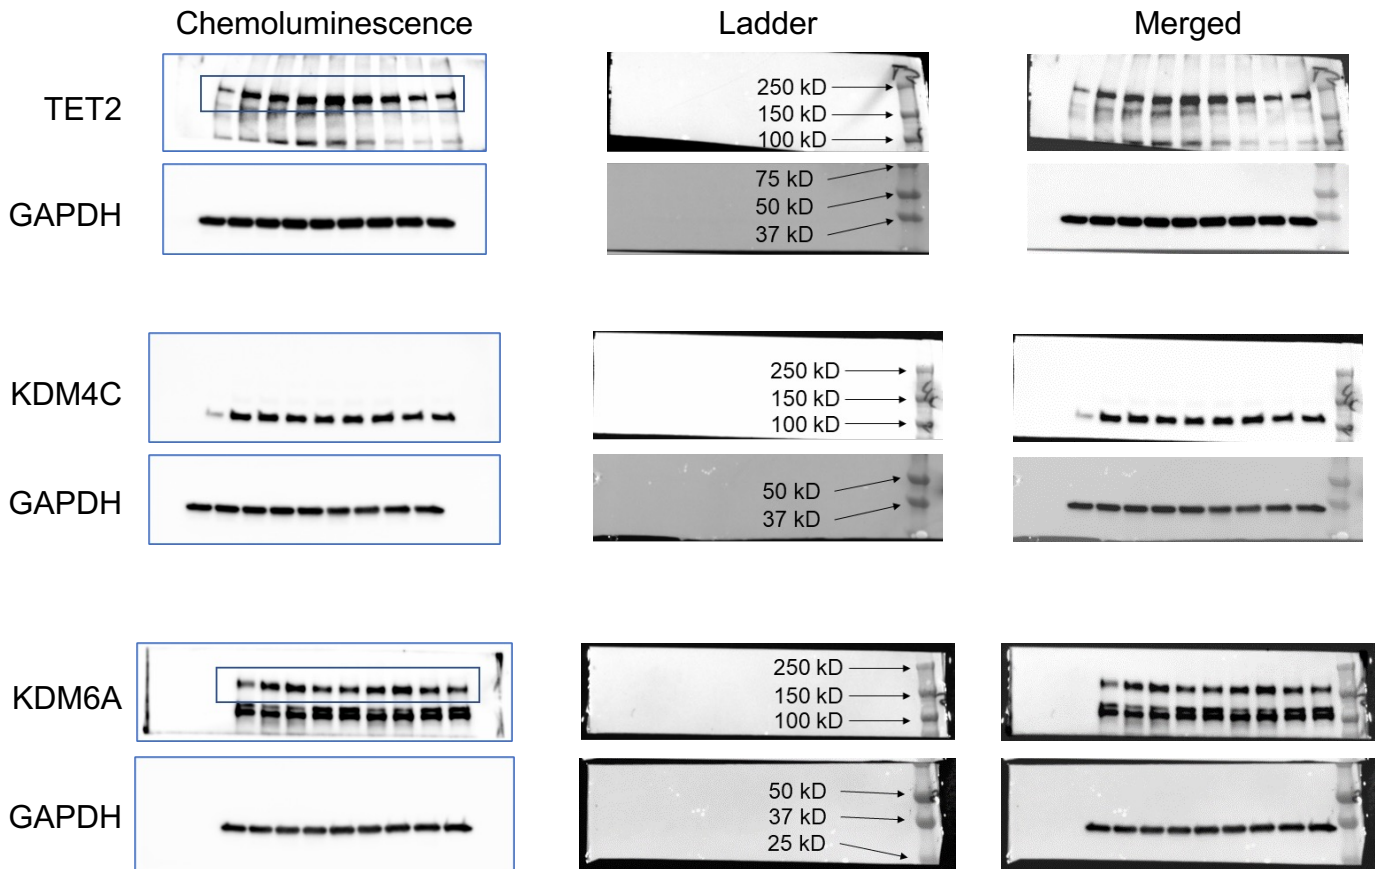

Supplement: 41467_2022_32915_MOESM1_ESM.pdf [file 41467_2022_32915_MOESM1_ESM.pdf]
